# Supplementary material for: Aldoximes enable proton-relayed NMR hyperpolarisation
Source: Royal Society of Chemistry journal article supplement (doi:10.1039/d4cc03231d), 2024-01-01
Supplement: d4cc03231d1.pdf [file d4cc03231d1.pdf]

*Supporting Information for*  
**Aldoximes Enable Proton-Relayed NMR Hyperpolarisation**

Naomi E. Leydman and Philip L. Norcott\*

Research School of Chemistry, Australian National University, Canberra ACT, 2601, Australia

Email: philip.norcott@anu.edu.au

***Table of Contents***

**Appendix S1. Experimental methods and characterisation**

|                                                                                    |    |
|------------------------------------------------------------------------------------|----|
| 1.1 General experimental.....                                                      | S2 |
| 1.2 Synthesis of oximes .....                                                      | S2 |
| 1.3 General procedure for SABRE experiments.....                                   | S4 |
| 1.4 NMR assignment of $[\text{IrCl}(\text{H})_2(\text{IMes})(\text{Z}-1)_2]$ ..... | S5 |

**Appendix S2. Hyperpolarised  $^1\text{H}$  spectra – 400 MHz**

|                                                                                                                                                           |     |
|-----------------------------------------------------------------------------------------------------------------------------------------------------------|-----|
| 2.1 $^1\text{H}$ enhancement factors for Z-1, $[\text{IrCl}(\text{H})_2(\text{IMes})(\text{Z}-1)_2]$ , and $\text{H}_2\text{O}$ as a function of PTF..... | S10 |
| 2.2 $^1\text{H}$ SABRE spectra as a function of polarisation transfer field.....                                                                          | S12 |
| 2.3 Polarisation transfer at increased temperature .....                                                                                                  | S18 |

**Appendix S3. Hyperpolarised  $^1\text{H}$  spectra – 60 MHz**

|                                                                                            |     |
|--------------------------------------------------------------------------------------------|-----|
| 3.1 Compound E-1 .....                                                                     | S20 |
| 3.2 Compound Z-1 .....                                                                     | S20 |
| 3.3 Compound E-2 .....                                                                     | S21 |
| 3.4 Compound Z-2 .....                                                                     | S21 |
| 3.5 Compound E-3 .....                                                                     | S22 |
| 3.6 Compound Z-3 .....                                                                     | S22 |
| 3.7 Compound (E:Z)-1 (14:1 mixture).....                                                   | S23 |
| 3.8 Summary of oxime enhancements.....                                                     | S23 |
| 3.9 SABRE-Relay: $\text{H}_2\text{O}$ hyperpolarisation after extended reaction times..... | S24 |
| 3.10 SABRE-Relay: MeOH hyperpolarisation in dried $\text{CD}_2\text{Cl}_2$ .....           | S25 |

**Appendix S4. Computational details**

|                                                          |     |
|----------------------------------------------------------|-----|
| 4.1 General details and summary of energies.....         | S26 |
| 4.2 Cartesian coordinates for optimised geometries ..... | S26 |

|                         |            |
|-------------------------|------------|
| <b>References .....</b> | <b>S35</b> |
|-------------------------|------------|

## Appendix S1. Experimental methods and characterisation

### 1.1 General experimental

All reagents and solvents were used directly from commercial sources unless otherwise stated. Petroleum here refers to the fraction of petroleum spirits boiling between 40-60 °C, and silica refers to Chemsupply silica gel 60 (0.04-0.06 mm, 230-400 mesh). Thin layer chromatography (TLC) used Merck F<sub>254</sub> aluminium-backed silica plates, which were visualized under UV light (254 and 365 nm), or using ethanolic anisaldehyde or potassium permanganate stains. High-field NMR spectra (400 MHz for <sup>1</sup>H and 100 MHz for <sup>13</sup>C with broadband decoupling) were acquired on a Bruker AVANCE 400 spectrometer, while low-field NMR spectra (60 MHz for <sup>1</sup>H) were acquired on an Nanalysis 60e benchtop spectrometer. Chemical shifts are represented in parts per million (ppm) and calibrated to the solvent residual <sup>1</sup>H signal or <sup>13</sup>C signal.<sup>1</sup> Scalar coupling constants (*J*) are given in Hertz (Hz).

### 1.2 Synthesis of oximes

#### Benzaldehyde oxime (1)

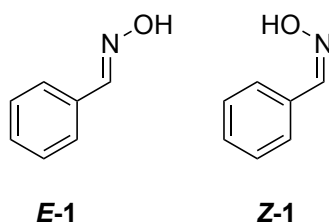

To a solution of benzaldehyde dimethyl acetal (1.0 mL, 6.7 mmol) in THF (100 mL) and H<sub>2</sub>O (10 mL) was added hydroxylamine hydrochloride (510 mg, 7.3 mmol, 1.1 eq.), and the reaction mixture was stirred at room temperature overnight. Diluted with brine (100 mL) and extracted with CH<sub>2</sub>Cl<sub>2</sub> (3 x 100 mL), washed with further brine (100 mL), dried over Na<sub>2</sub>SO<sub>4</sub> and concentrated under reduced pressure. Purified by flash column chromatography on silica, eluting with 10% EtOAc/petroleum, to give:

**E-1** (457 mg, 56%) as a colourless oil; <sup>1</sup>H NMR (400 MHz, *d*<sub>6</sub>-DMSO) 11.25 (s, 1H), 8.14 (s, 1H), 7.60-7.58 (m, 2H), 7.41-7.36 (m, 3H); <sup>13</sup>C NMR (101 MHz, *d*<sub>6</sub>-DMSO) 148.2 (CH), 133.1 (C), 129.3 (CH), 128.8 (2 CH), 126.5 (2 CH), and

**Z-1** (35 mg, 4%) as a colourless solid;  $^1\text{H NMR}$  (400 MHz,  $d_6$ -DMSO) 11.63 (s, 1H), 7.96 (dd,  $J = 7.9, 1.8$  Hz, 2H), 7.45-7.39 (m, 3H);  $^{13}\text{C NMR}$  (101 MHz,  $d_6$ -DMSO) 144.9 (CH), 131.2 (C), 130.4 (2 CH), 129.6 (CH), 128.5 (2 CH).

***p*-Methoxybenzaldehyde oxime (2)**

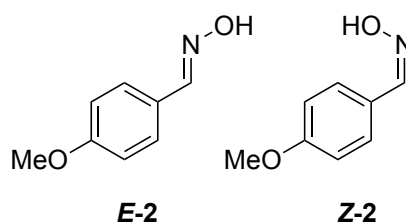

To a solution of anisaldehyde dimethyl acetal (0.90 mL, 5.3 mmol) in THF (50 mL) and  $\text{H}_2\text{O}$  (5 mL) was added hydroxylamine hydrochloride (630 mg, 9.1 mmol, 1.7 eq.), and the reaction mixture was stirred at room temperature overnight. Diluted with brine (50 mL) and extracted with  $\text{CH}_2\text{Cl}_2$  (3 x 50 mL), washed with further brine (50 mL), dried over  $\text{Na}_2\text{SO}_4$  and concentrated under reduced pressure. Purified by flash column chromatography on silica, eluting with 20% EtOAc/petroleum, to give:

**E-2** (468 mg, 58%) as a colourless solid;  $^1\text{H NMR}$  (400 MHz,  $d_6$ -DMSO) 11.01 (s, 1H), 8.08 (s, 1H), 7.54-7.52 (m, 2H), 6.94-6.92 (m, 2H), 3.75 (s, 3H);  $^{13}\text{C NMR}$  (101 MHz,  $d_6$ -DMSO) 160.4 (C), 148.0 (CH), 128.1 (2 CH), 125.8 (C), 114.3 (2 CH), 55.3 ( $\text{CH}_3$ ), and

**Z-2** (66 mg, 8%) as a colourless solid;  $^1\text{H NMR}$  (400 MHz,  $d_6$ -DMSO) 11.40 (s, 1H), 7.95-7.93 (m, 2H), 7.31 (s, 1H), 6.98-6.96 (m, 2H), 3.78 (s, 3H);  $^{13}\text{C NMR}$  (101 MHz,  $d_6$ -DMSO) 159.9 (C), 144.4 (CH), 132.4 (2 CH), 124.3 (C), 113.8 (2 CH), 52.3 ( $\text{CH}_3$ ).

### *p*-Trifluoromethylbenzaldehyde oxime (**3**)<sup>2</sup>

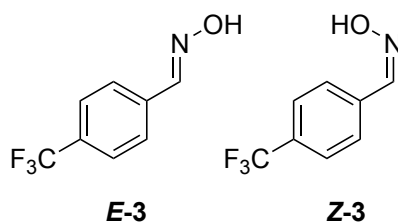

*p*-(Trifluoromethyl)benzaldehyde (680  $\mu$ L, 5.0 mmol) was added to a solution of hydroxylamine hydrochloride (380 mg, 5.5 mmol, 1.1 eq.) in THF/EtOH/H<sub>2</sub>O (2:5:1, 8 mL), and the reaction mixture was stirred at room temperature overnight. The volatiles were removed under reduced pressure and the residue extracted with Et<sub>2</sub>O (3 x 20 mL). The organic extracts were washed with brine (20 mL), dried over Na<sub>2</sub>SO<sub>4</sub> and concentrated under reduced pressure. Purified by flash column chromatography on silica, eluting with 10% EtOAc/petroleum, to give:

**E-3** (682 mg, 72%) as a colourless solid; <sup>1</sup>H NMR (400 MHz, *d*<sub>6</sub>-DMSO) 11.61 (s, 1H), 8.25 (s, 1H), 7.81-7.79 (m, 2H), 7.75-7.73 (m, 2H); <sup>13</sup>C NMR (101 MHz, *d*<sub>6</sub>-DMSO) 147.1 (s, CH), 137.1 (s, C), 129.2 (q, <sup>2</sup>*J*<sub>CF</sub> = 32.2 Hz, C), 127.0 (s, 2 CH), 125.6 (q, <sup>3</sup>*J*<sub>CF</sub> = 3.9 Hz, 2 CH), 124.1 (q, <sup>1</sup>*J*<sub>CF</sub> = 272 Hz, CF<sub>3</sub>); <sup>19</sup>F NMR (376 MHz, *d*<sub>6</sub>-DMSO) -61.2 (s), and

**Z-3** (24 mg, 3%) as a colourless solid; <sup>1</sup>H NMR (400 MHz, *d*<sub>6</sub>-DMSO) 12.0 (s, 1H), 8.18-8.16 (m, 2H), 7.82-7.80 (m, 2H), 7.58 (s, 1H); <sup>13</sup>C NMR (101 MHz, *d*<sub>6</sub>-DMSO) 143.5 (s, CH), 134.4 (s, C), 130.9 (s, 2 CH), 129.2 (q, <sup>2</sup>*J*<sub>CF</sub> = 31.4 Hz, C), 125.3 (q, <sup>3</sup>*J*<sub>CF</sub> = 3.8 Hz, 2 CH), 124.0 (q, <sup>1</sup>*J*<sub>CF</sub> = 272 Hz, CF<sub>3</sub>); <sup>19</sup>F NMR (376 MHz, *d*<sub>6</sub>-DMSO) -61.3 (s).

### 1.3 General procedure for SABRE experiments

[IrCl(COD)(IMes)] was produced from [Ir(COD)Cl]<sub>2</sub> and IMes.HCl according to established procedures.<sup>3</sup> Hydrogen gas (>99.999% purity) was generated from a Domnick Hunter 60H and fed through a coaxial parahydrogen generator (HyperSpin Scientific UG) submerged in liquid nitrogen to achieve a conversion temperature of 77 K, to produce *p*-H<sub>2</sub> with approximately 50% enrichment level. Samples containing [IrCl(COD)(IMes)] (10 mM) and oxime (30 mM) in CD<sub>2</sub>Cl<sub>2</sub> (0.6 mL) were prepared in a Norrell S-5-300-JY-7 NMR tube (5 mm diameter, fitted with a J Young's tap), and degassed using the freeze-pump-thaw method. The sample tube was pressurised to 2 bar (gauge) with *p*-H<sub>2</sub>, sealed, and shaken for 10 seconds at 65 G in a handheld

shaker<sup>4</sup> then transferred to a NMR spectrometer operating at 60 MHz or 400 MHz described above. A single 90° pulse was immediately applied to measure each hyperpolarised <sup>1</sup>H spectrum, and the sample headspace evacuated and refilled with fresh p-H<sub>2</sub> before each acquisition (typically 4 replicates). A thermally polarised reference spectrum using identical parameters was acquired after allowing the hyperpolarised signal to relax to thermal equilibrium. Enhancement factors were calculated as the ratio of hyperpolarised to thermally polarised integrals.

#### 1.4 NMR assignment of [IrCl(H)<sub>2</sub>(IMes)(Z-1)<sub>2</sub>]

Prepared *in situ* from the mixture of compound Z-1 (30 mM, 3 equiv.) and [IrCl(COD)(IMes)] (10 mM) in CD<sub>2</sub>Cl<sub>2</sub>, under H<sub>2</sub> (2 bar) for 1 h. Some diagnostic NOEs depicted in red.

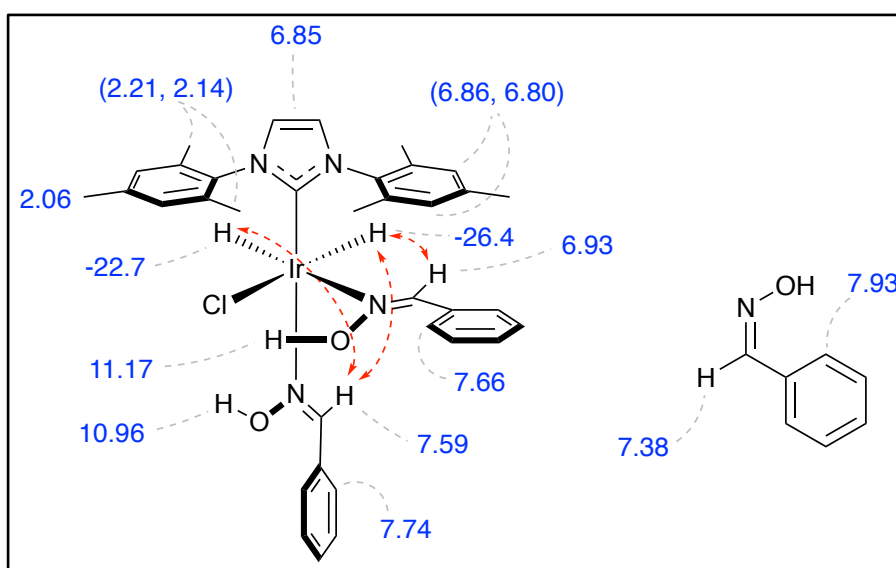

1D  $^1\text{H}$  spectrum: 400 MHz,  $\text{CD}_2\text{Cl}_2$

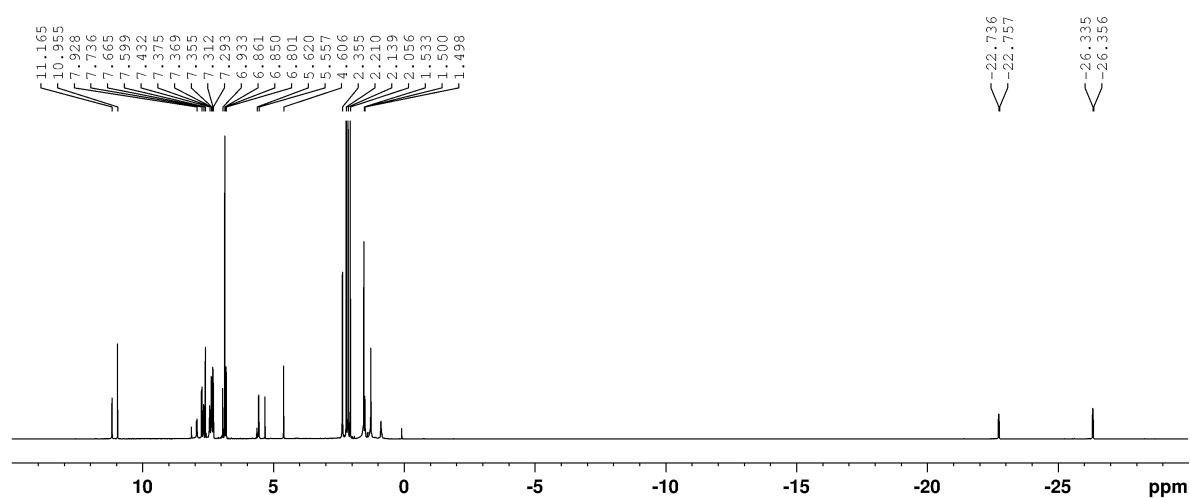

Inset between 8.5 – 6.5 ppm: 400 MHz,  $\text{CD}_2\text{Cl}_2$

Identical formation of  $[\text{IrCl}(\text{H})_2(\text{IMes})(\text{Z-1})_2]$  from only **2 eq. of Z-1**; free peaks are absent.

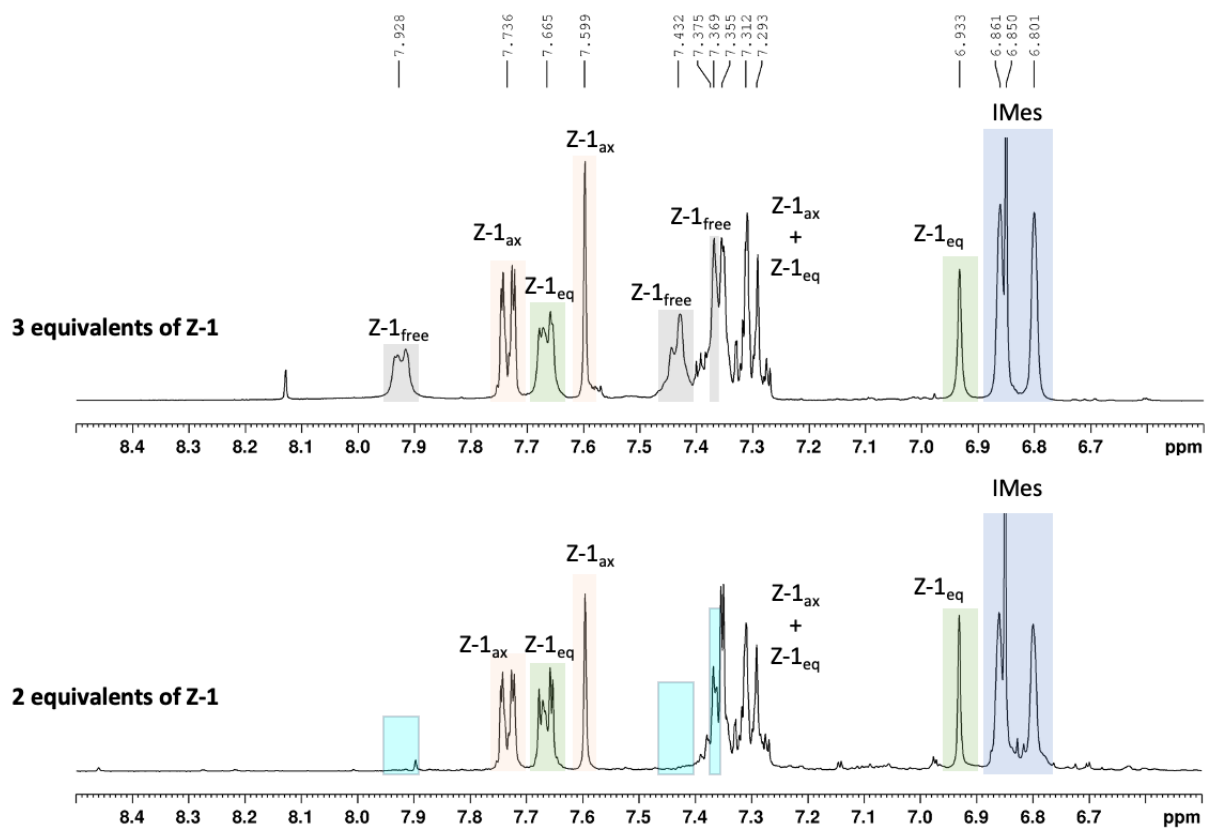

## 2D Spectrum - NOESY:

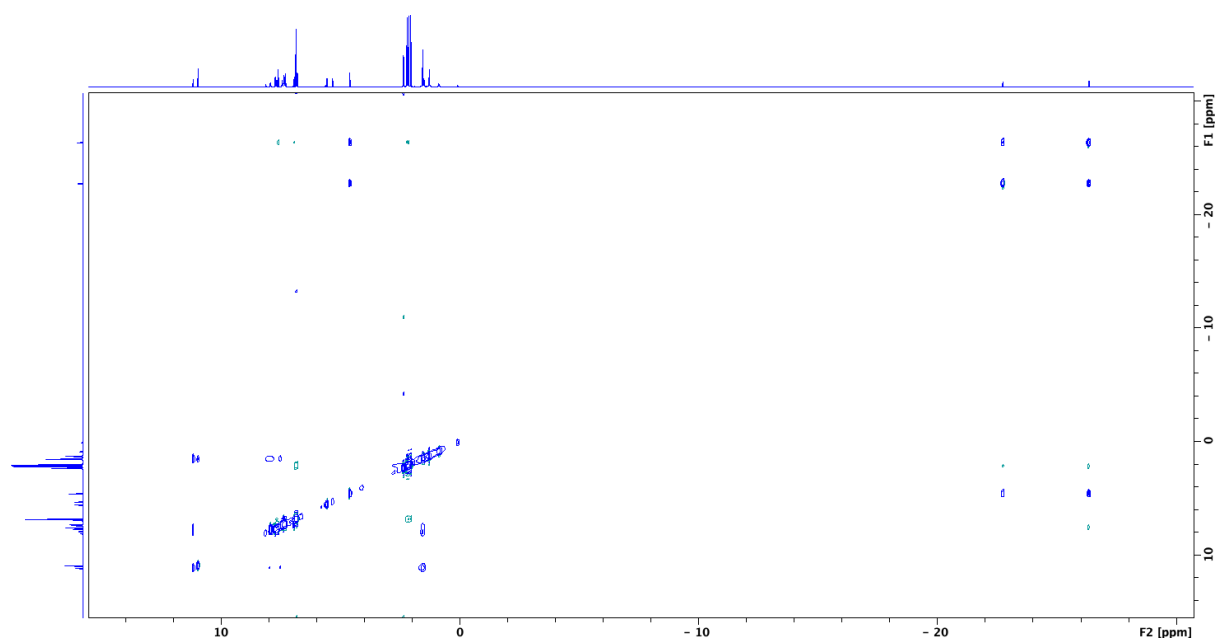

### Inset:

*Left, exchange* between **oxime OH** (x2 at ~11 ppm bound, ~7.5 ppm free) and **H<sub>2</sub>O** (1.5 ppm).

*Right, NOEs* between bound **oxime HC=N** (6.9 & 7.6 ppm) and **Ir-H** (-22.7 & -26.4 ppm).

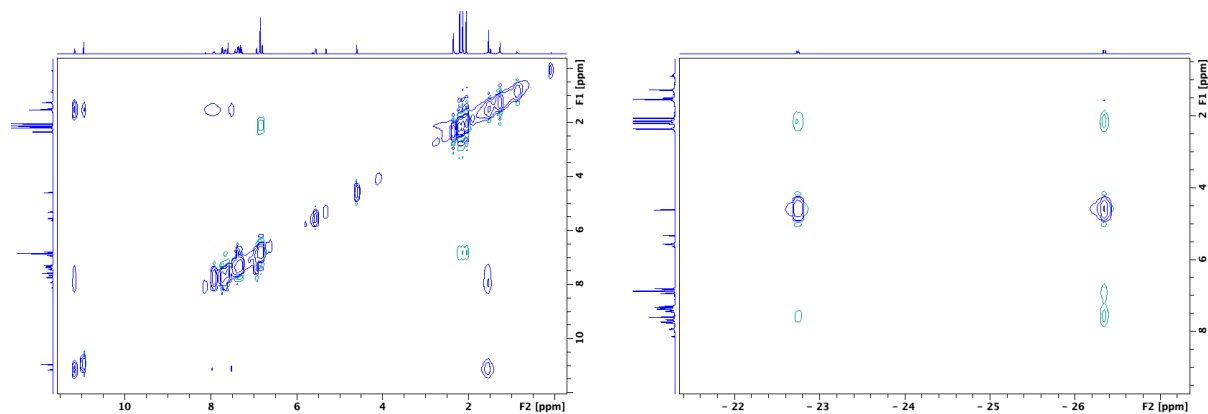

2D Spectrum - HSQC:

Highlighting correlations at the  $\underline{\text{HC}}=\text{N}$  sites for **Z-1<sub>free</sub>**, **Z-1<sub>ax</sub>** and **Z-1<sub>eq</sub>**.

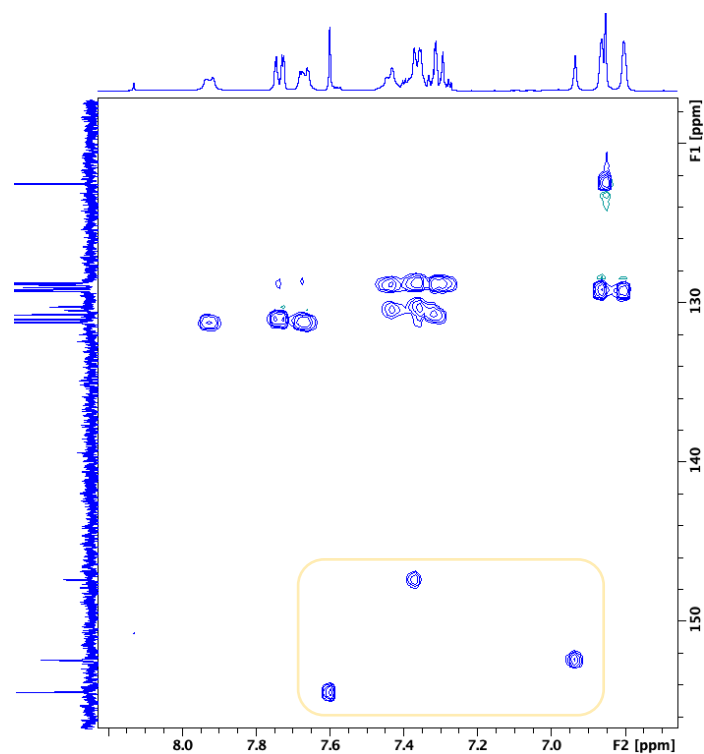

2D Spectrum –  $^1\text{H}$ - $^{13}\text{C}$  HMBC:

Highlighting correlations with bound OH sites for **Z-1<sub>ax</sub>** and **Z-1<sub>eq</sub>**.

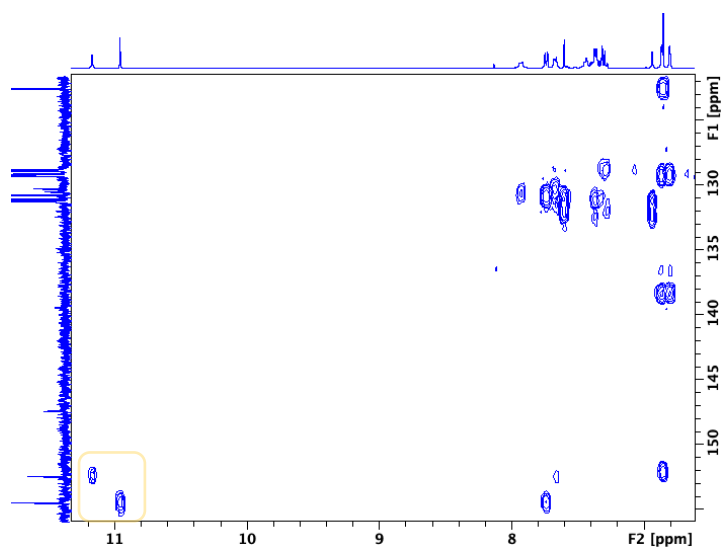



2D Spectrum –  $^1\text{H}$ - $^{15}\text{N}$  HMBC:

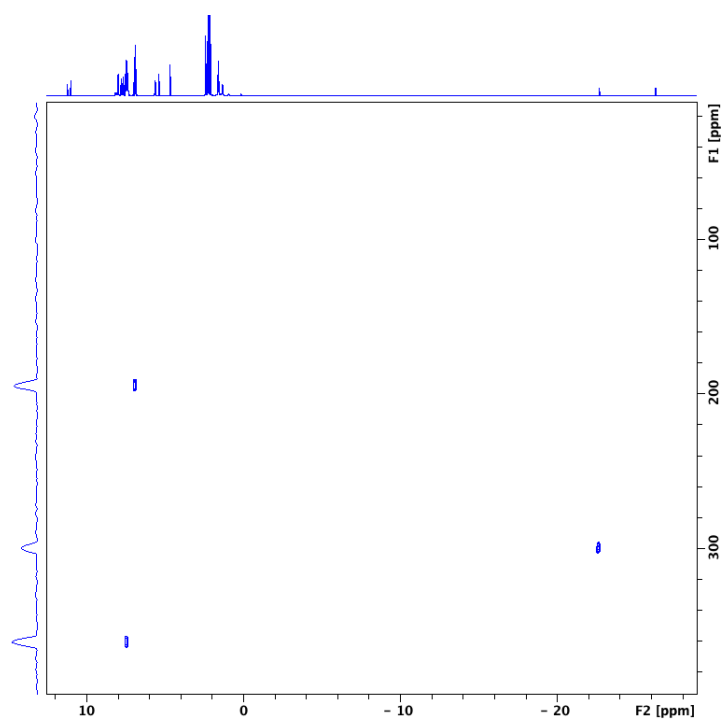

## Appendix S2. Hyperpolarised $^1\text{H}$ spectra – 400 MHz

### 2.1 $^1\text{H}$ enhancement factors for Z-1, $[\text{IrCl}(\text{H})_2(\text{IMes})(\text{Z-1})_2]$ , and $\text{H}_2\text{O}$ as a function of polarisation transfer field

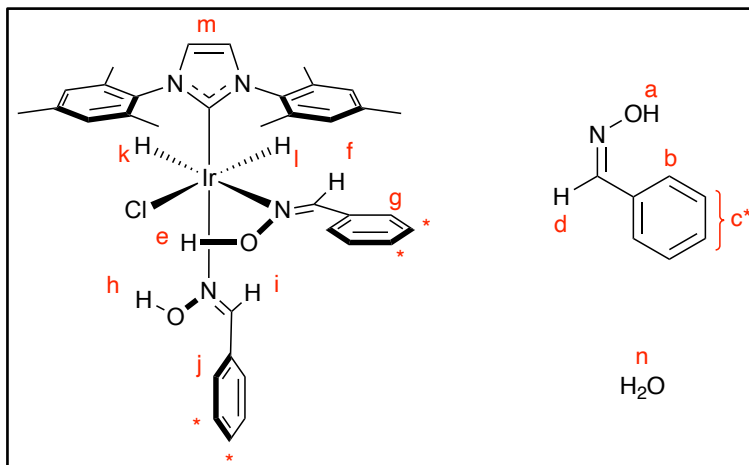

\* Hyperpolarised enhancements combined or not determined due to spectral overlap

| Position label | Position description | Chemical shift ( $\delta$ ) | Polarisation transfer field (PTF) |       |       |       |       |
|----------------|----------------------|-----------------------------|-----------------------------------|-------|-------|-------|-------|
|                |                      |                             | 0.5 G                             | 45 G  | 65 G  | 85 G  | 130 G |
| a              | Z-1 (free)           | 8.10 ppm                    | -27.1                             | -36.7 | -74.0 | -46.3 | -19.9 |
| b              | Z-1 (free)           | 7.93 ppm                    | -2.5                              | -9.9  | -39.2 | -21.6 | -3.0  |
| c              | Z-1 (free)           | 7.44 ppm                    | -0.5                              | -9.4  | -45.3 | -29.1 | -4.2  |
| d              | Z-1 (free)           | 7.38 ppm                    | -12.4                             | -15.0 | -48.3 | -30.0 | -9.9  |
| e              | Z-1 (eq)             | 11.17 ppm                   | -27.5                             | -34.6 | -67.3 | -50.5 | -19.9 |
| f              | Z-1 (eq)             | 6.93 ppm                    | -22.3                             | -20.2 | -45.7 | -37.7 | -14.9 |
| g              | Z-1 (eq)             | 7.66 ppm                    | -2.4                              | -8.9  | -32.7 | -19.8 | -2.8  |
| h              | Z-1 (ax)             | 10.96 ppm                   | -24.3                             | -30.7 | -58.8 | -44.8 | -17.5 |
| i              | Z-1 (ax)             | 7.59 ppm                    | -8.6                              | -7.5  | -10.3 | -8.4  | -6.7  |
| j              | Z-1 (ax)             | 7.74 ppm                    | -2.7                              | -3.0  | -4.5  | -3.1  | -0.5  |
| k              | Ir-H                 | -22.7 ppm                   | 21.2                              | 10.6  | 9.0   | 9.1   | 12.1  |
| l              | Ir-H                 | -26.4 ppm                   | 18.9                              | 9.4   | 8.7   | 8.7   | 10.6  |
| m              | IMes                 | 6.85 ppm                    | 0.3                               | 0.1   | -1.0  | -0.1  | 0.5   |
| n              | $\text{H}_2\text{O}$ | 1.57 ppm                    | -24.5                             | -30.4 | -67.5 | -40.8 | -16.5 |

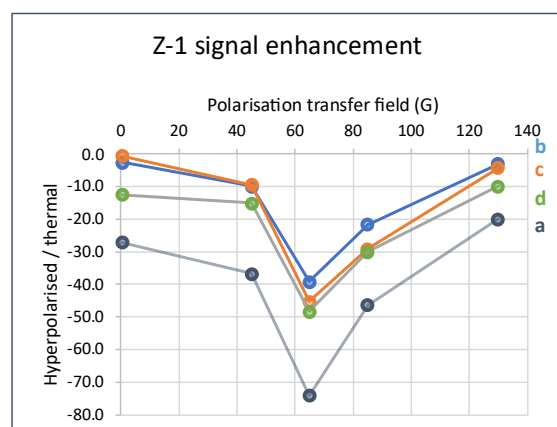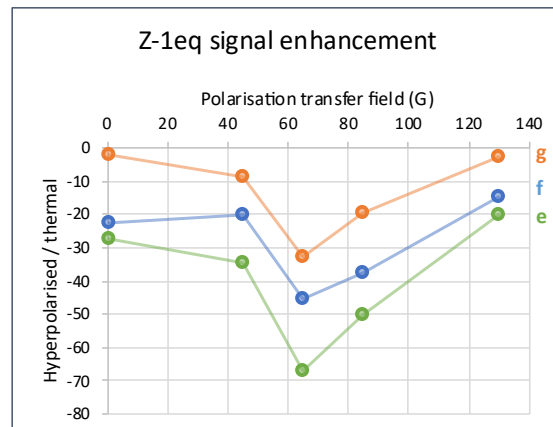

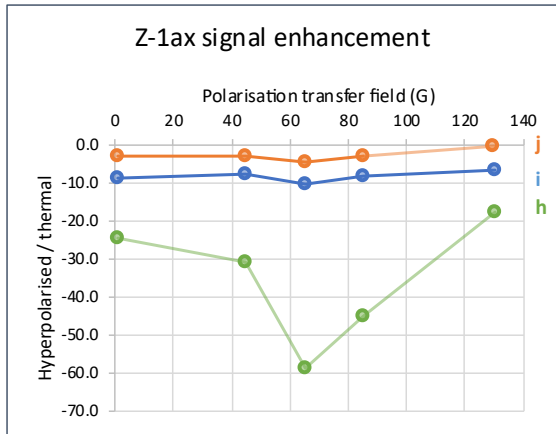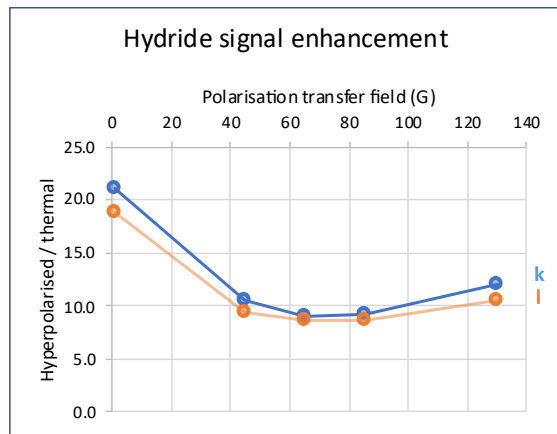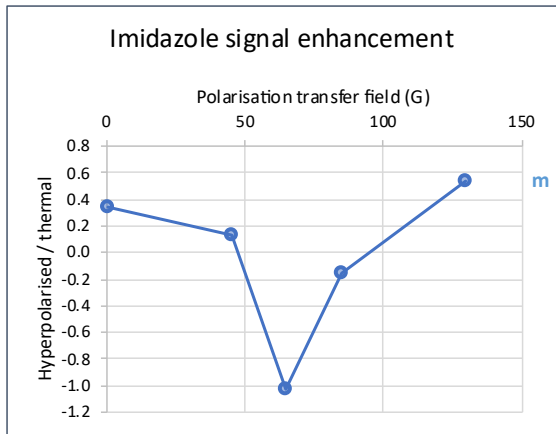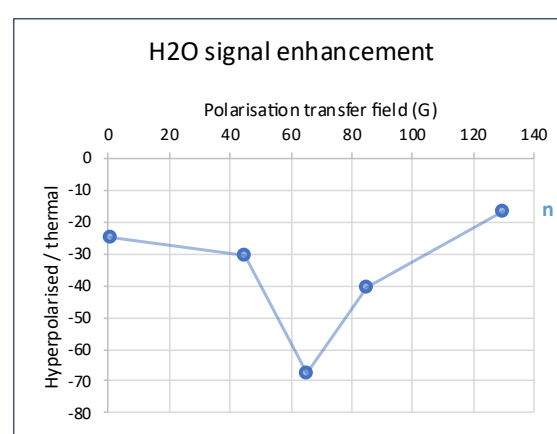

## 2.2 $^1\text{H}$ SABRE spectra as a function of polarisation transfer field

PTF = 0.5 G

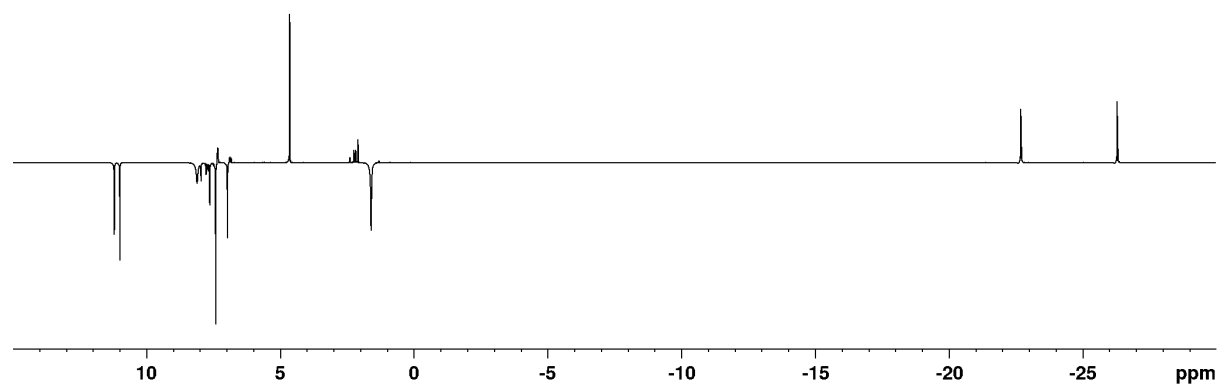

*Inset:*

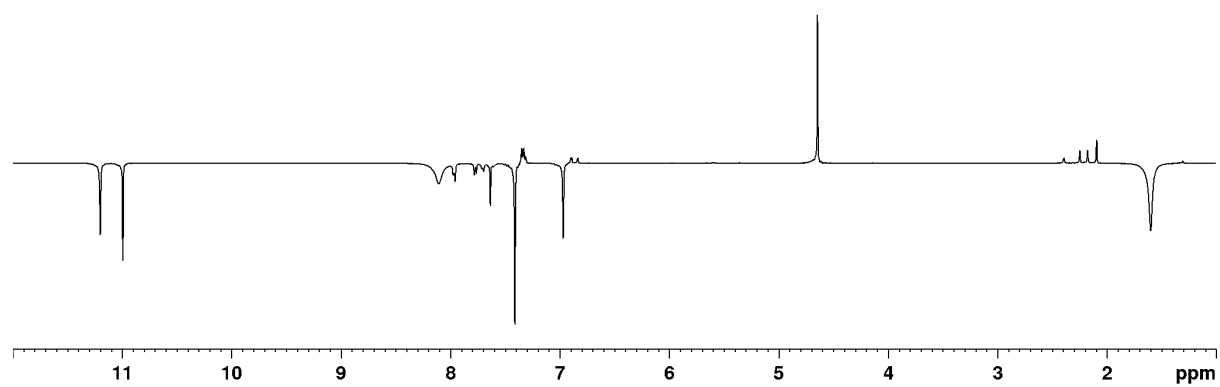

PTF = 45 G

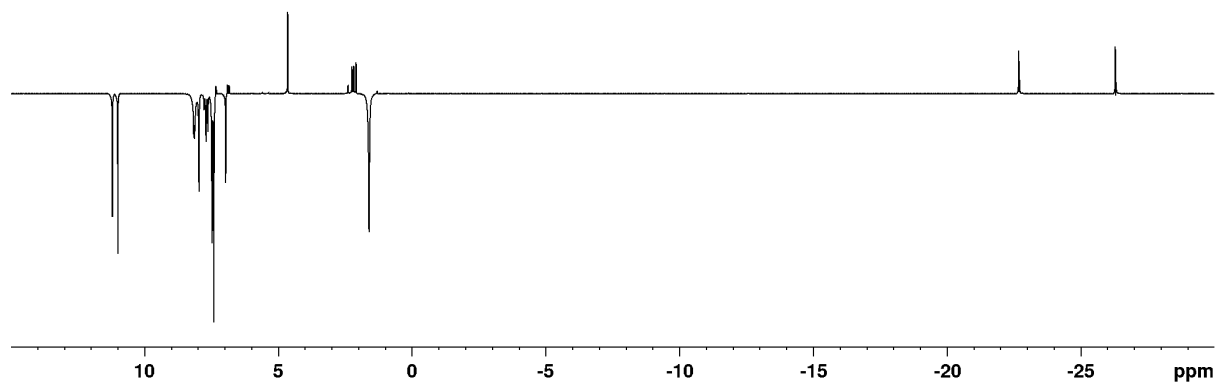

*Inset:*

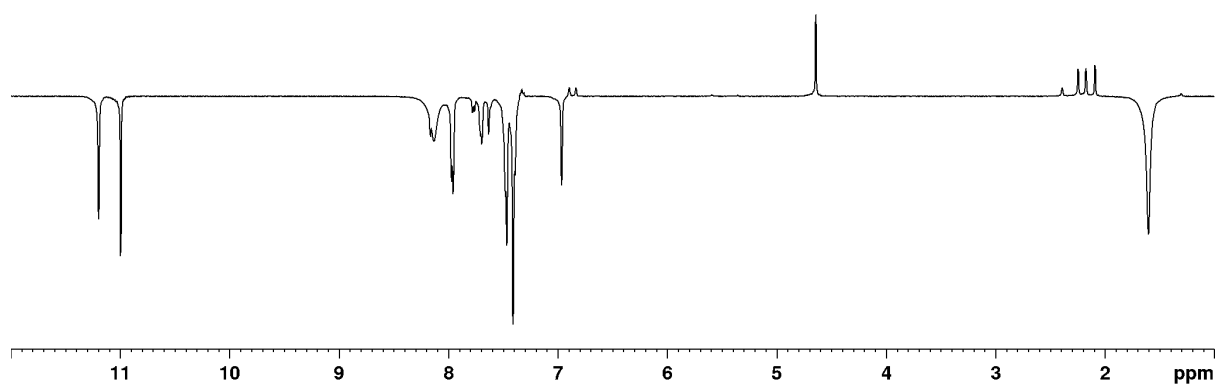

PTF = 65 G

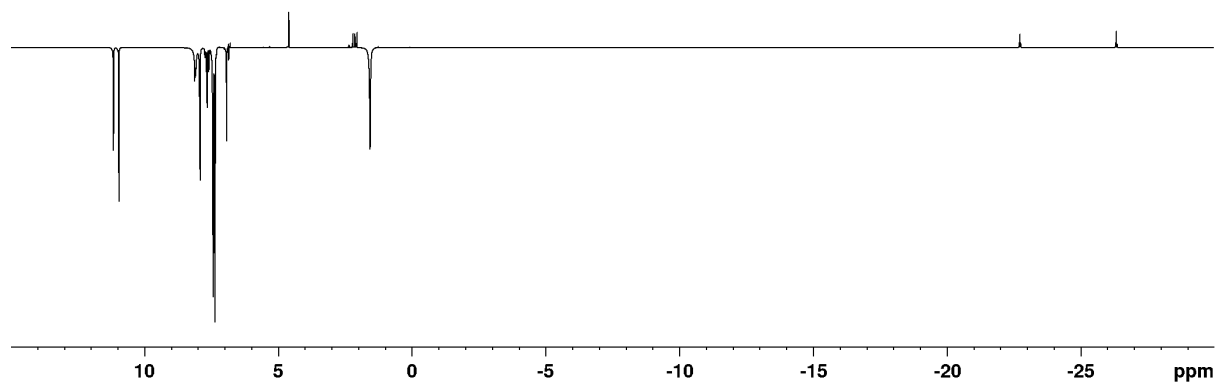

*Inset:*

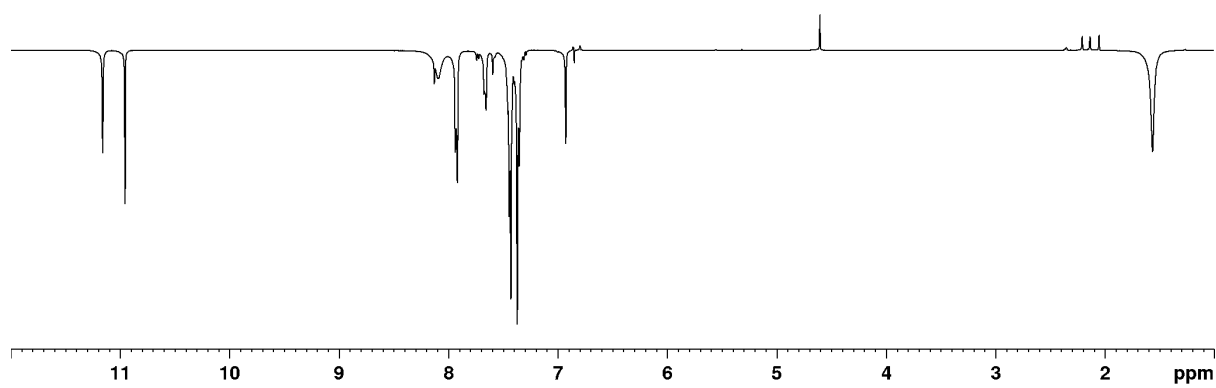

PTF = 85 G

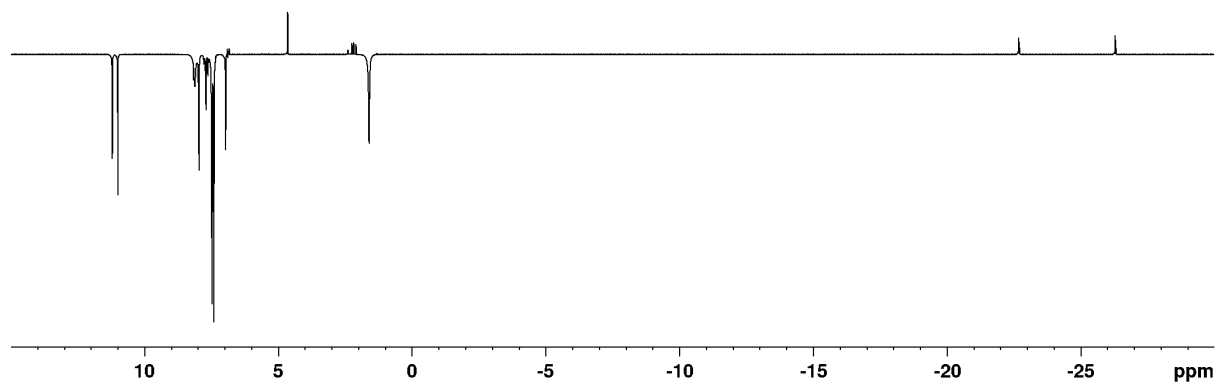

*Inset:*

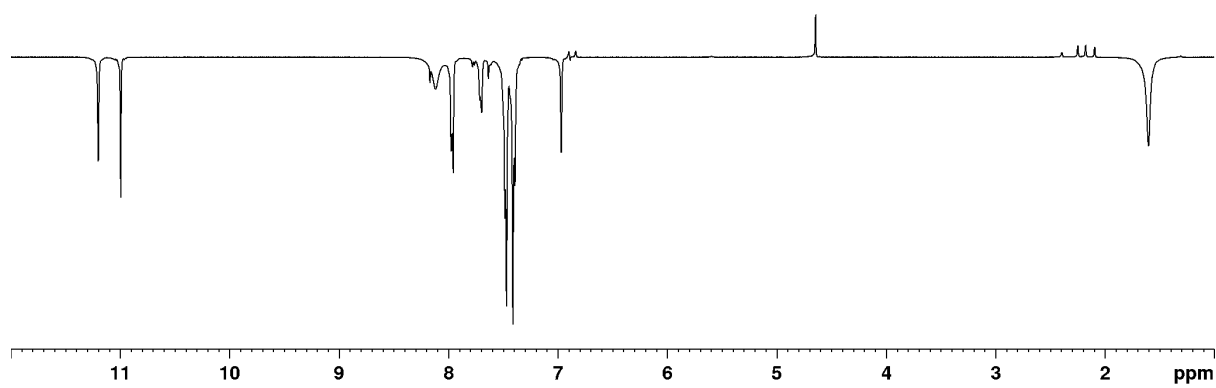

PTF = 130 G

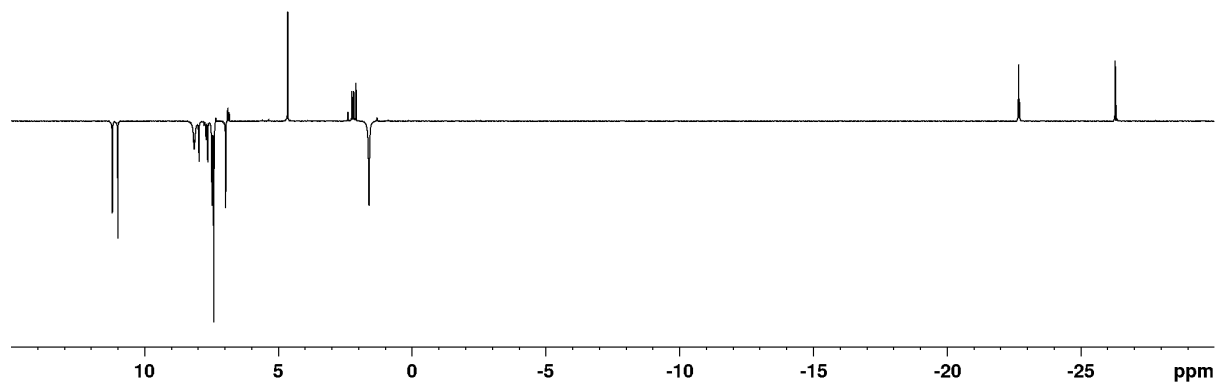

*Inset:*

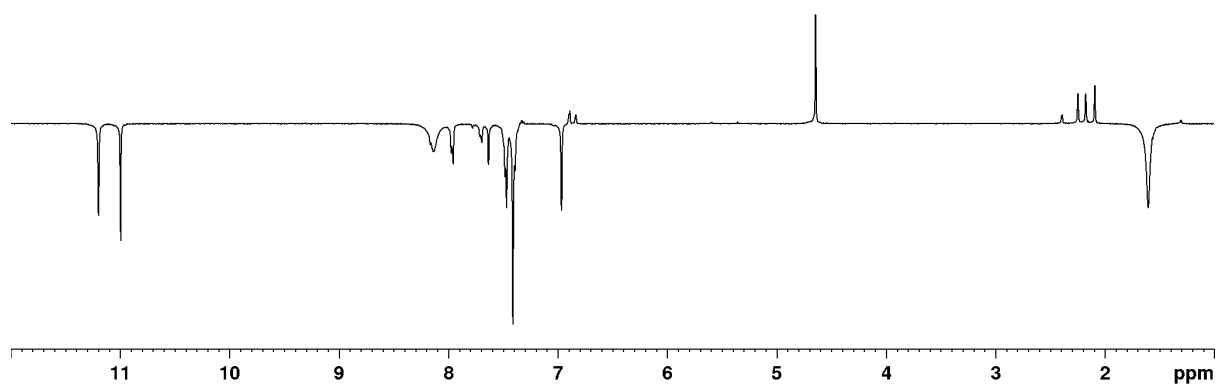



Thermally polarised spectrum:

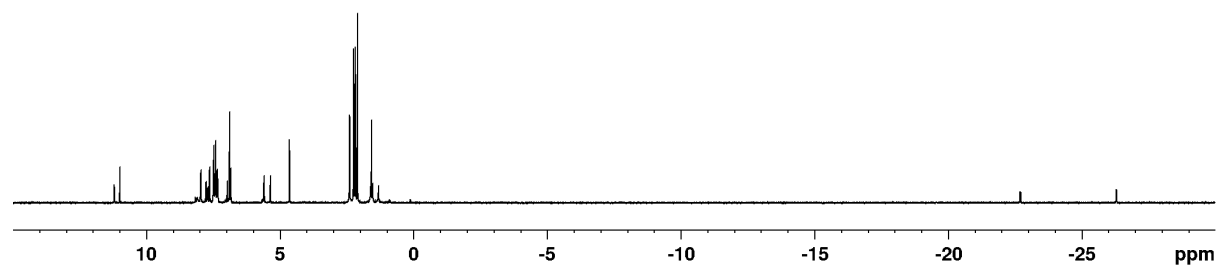

*Inset:*

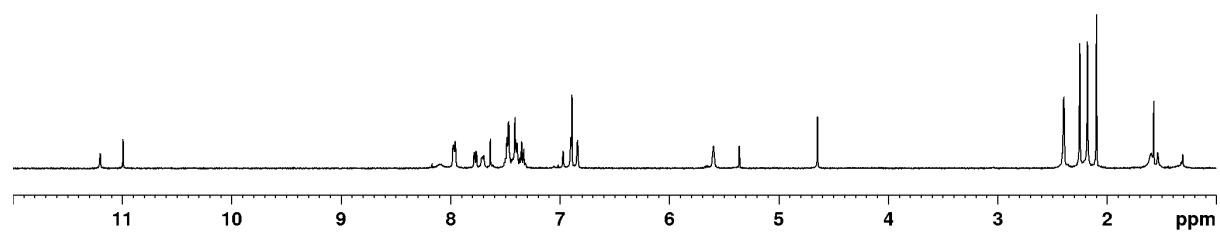

## 2.3 Polarisation transfer at increased temperature

Polarisation transfer at 40 °C (PTF = 65 G).

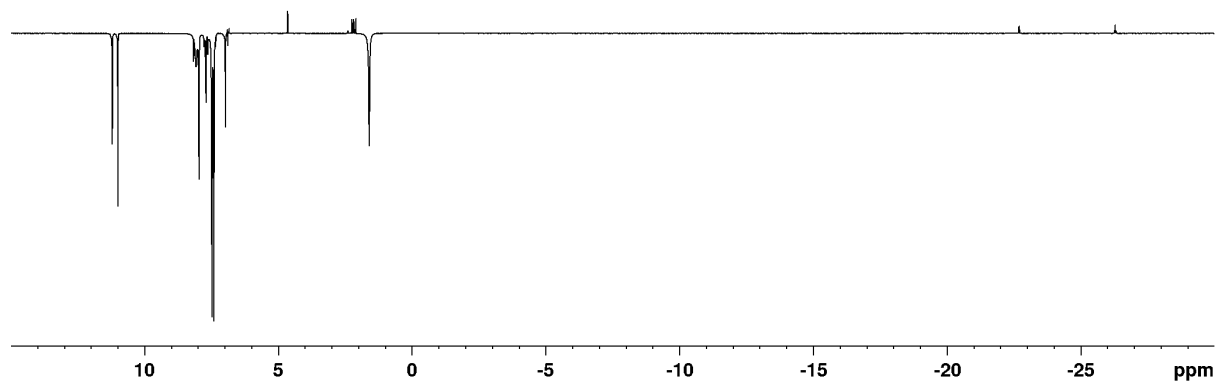

*Inset:*

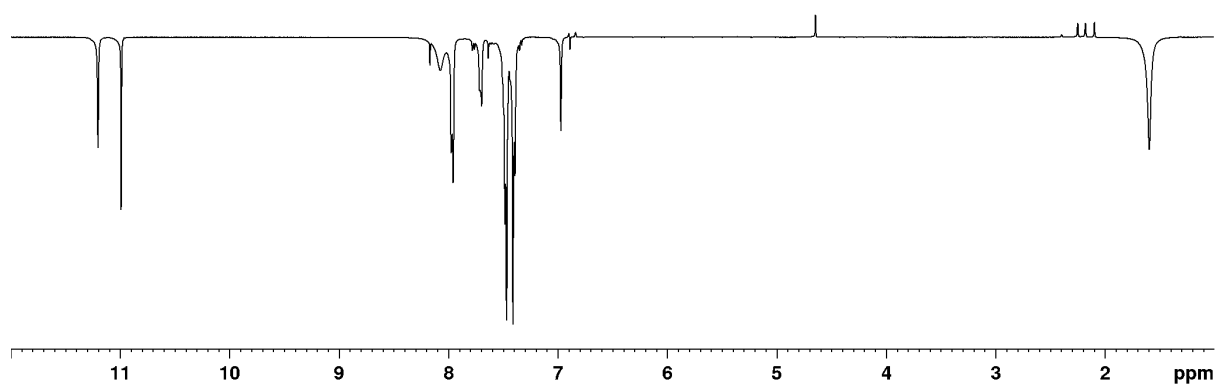

| Position label | Position description | Chemical shift ( $\delta$ ) | Polarisation transfer temperature ( $^{\circ}\text{C}$ ) |       | enhancement change (%)<br>20 $^{\circ}\text{C}$ $\rightarrow$ 40 $^{\circ}\text{C}$ |
|----------------|----------------------|-----------------------------|----------------------------------------------------------|-------|-------------------------------------------------------------------------------------|
|                |                      |                             | 20                                                       | 40    |                                                                                     |
| a              | Z-1 (free)           | 8.10 ppm                    | -74.0                                                    | -76.3 | +3%                                                                                 |
| b              | Z-1 (free)           | 7.93 ppm                    | -39.2                                                    | -48.8 | +25%                                                                                |
| c              | Z-1 (free)           | 7.44 ppm                    | -45.3                                                    | -58.0 | +28%                                                                                |
| d              | Z-1 (free)           | 7.38 ppm                    | -48.3                                                    | -52.8 | +9%                                                                                 |
| e              | Z-1 (eq)             | 11.17 ppm                   | -67.3                                                    | -88.9 | +32%                                                                                |
| f              | Z-1 (eq)             | 6.93 ppm                    | -45.7                                                    | -55.8 | +22%                                                                                |
| g              | Z-1 (eq)             | 7.66 ppm                    | -32.7                                                    | -43.1 | +32%                                                                                |
| h              | Z-1 (ax)             | 10.96 ppm                   | -58.8                                                    | -77.2 | +31%                                                                                |
| i              | Z-1 (ax)             | 7.59 ppm                    | -10.3                                                    | -8.9  | -14%                                                                                |
| j              | Z-1 (ax)             | 7.74 ppm                    | -4.5                                                     | -8.4  | +87%                                                                                |
| k              | Ir-H                 | -22.7 ppm                   | 9.0                                                      | 5.7   | -37%                                                                                |
| l              | Ir-H                 | -26.4 ppm                   | 8.7                                                      | 6.0   | -31%                                                                                |
| m              | IMes                 | 6.85 ppm                    | -1.0                                                     | -1.4  | +38%                                                                                |
| n              | H <sub>2</sub> O     | 1.57 ppm                    | -67.5                                                    | -81.2 | +20%                                                                                |

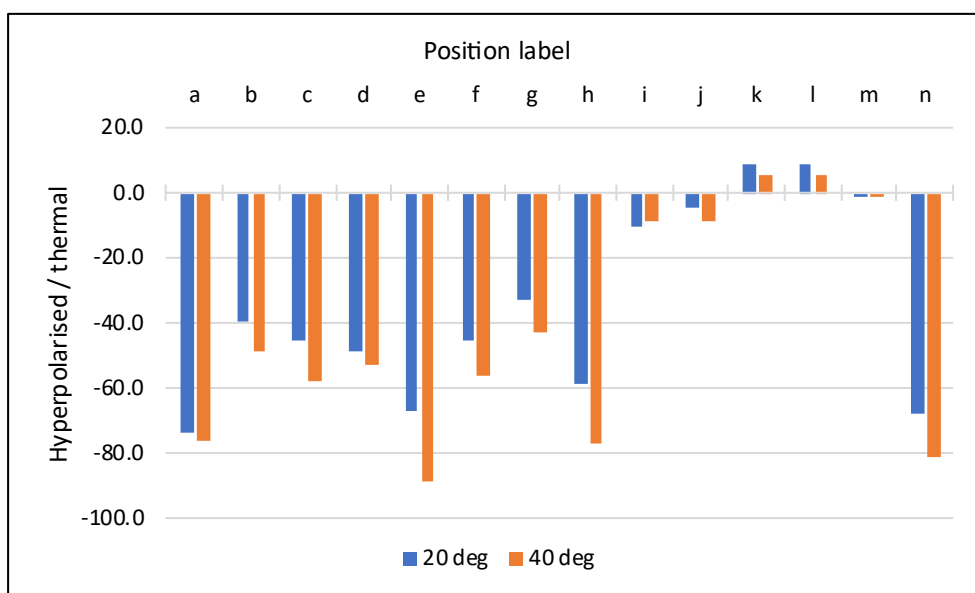

## Appendix S3. Hyperpolarised $^1\text{H}$ spectra – 60 MHz

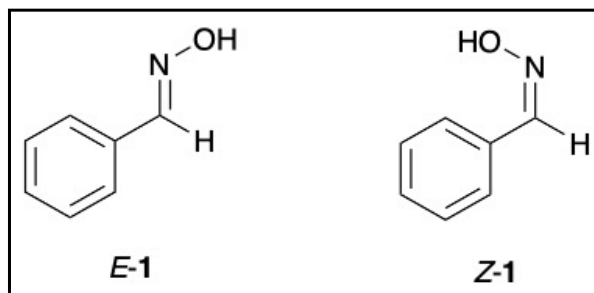

### 3.1 Compound E-1

*Top:* thermal spectrum. *Bottom:* hyperpolarised spectrum. 60 MHz

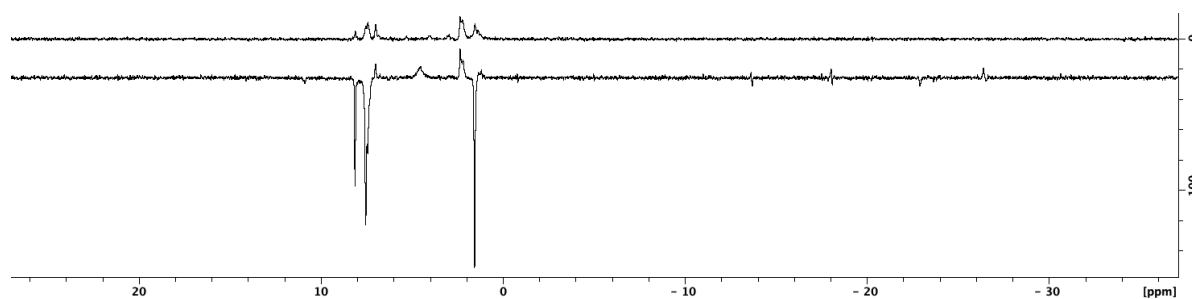

### 3.2 Compound Z-1

*Top:* thermal spectrum (vertically expanded x8). *Bottom:* hyperpolarised spectrum. 60 MHz

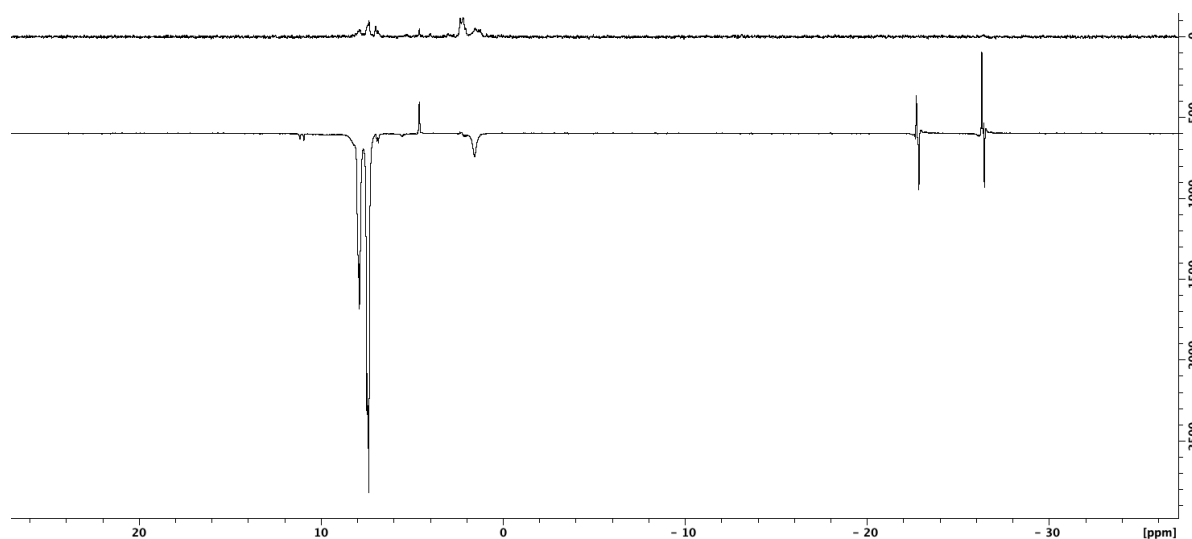

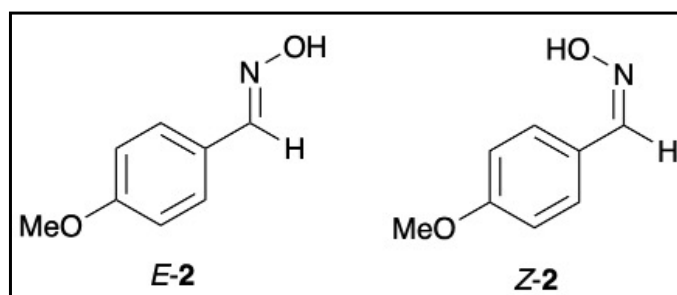

### 3.3 Compound E-2

*Top:* thermal spectrum. *Bottom:* hyperpolarised spectrum. 60 MHz

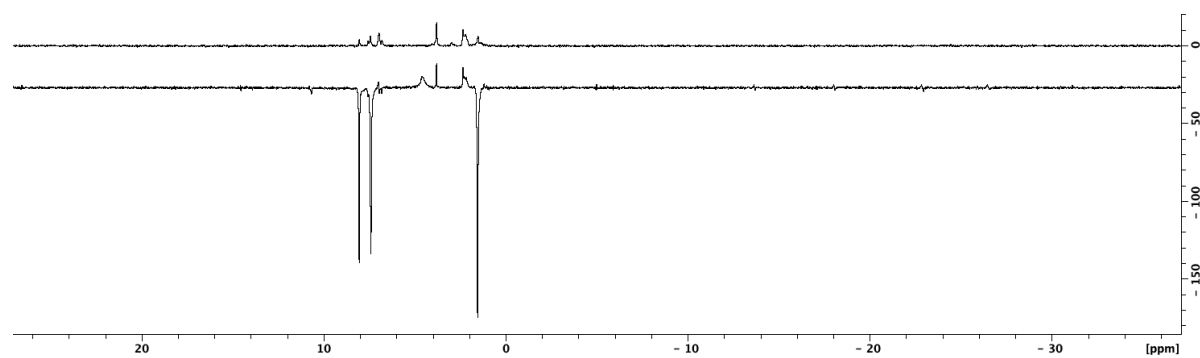

### 3.4 Compound Z-2

*Top:* thermal spectrum (vertically expanded x4). *Bottom:* hyperpolarised spectrum. 60 MHz

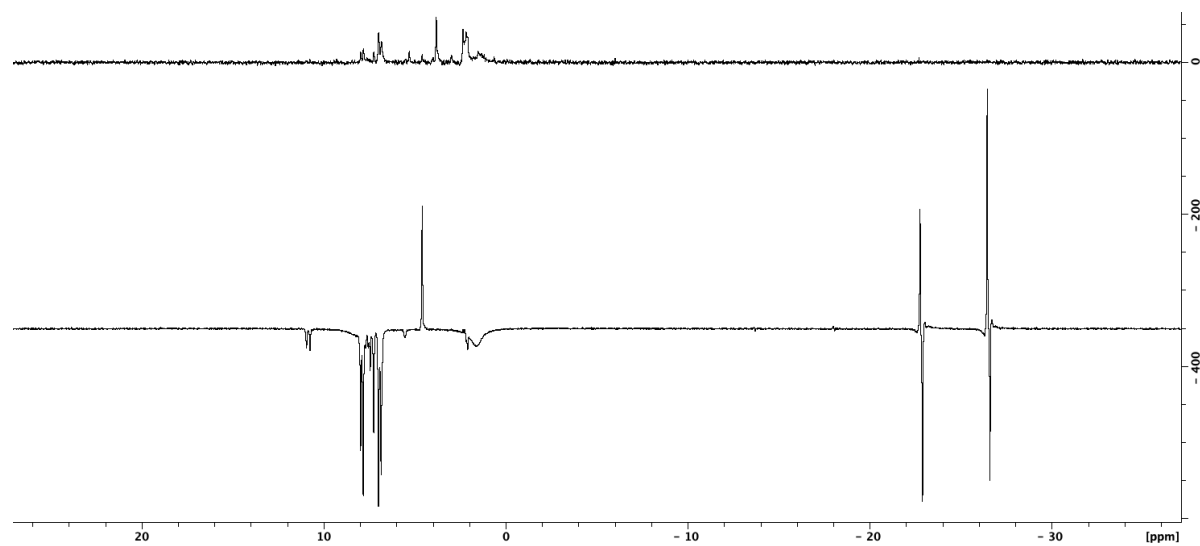

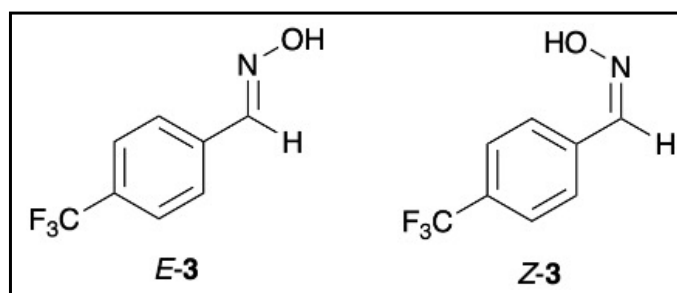

### 3.5 Compound E-3

*Top:* thermal spectrum. *Bottom:* hyperpolarised spectrum. 60 MHz

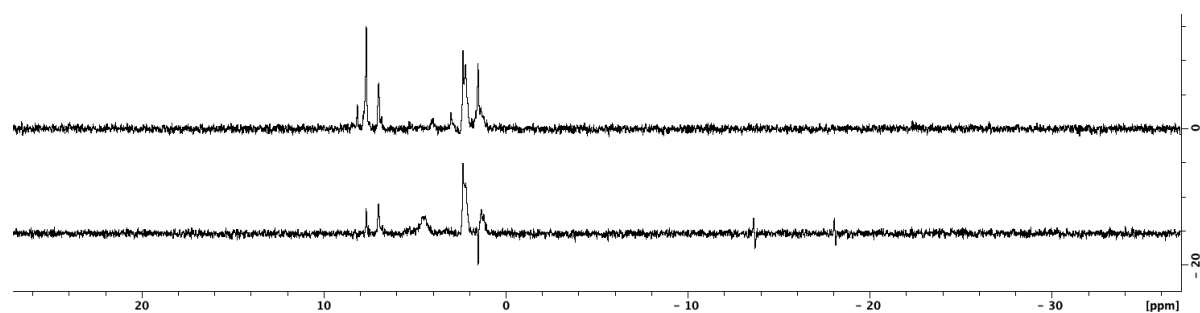

### 3.6 Compound Z-3

*Top:* thermal spectrum (vertically expanded x4). *Bottom:* hyperpolarised spectrum. 60 MHz

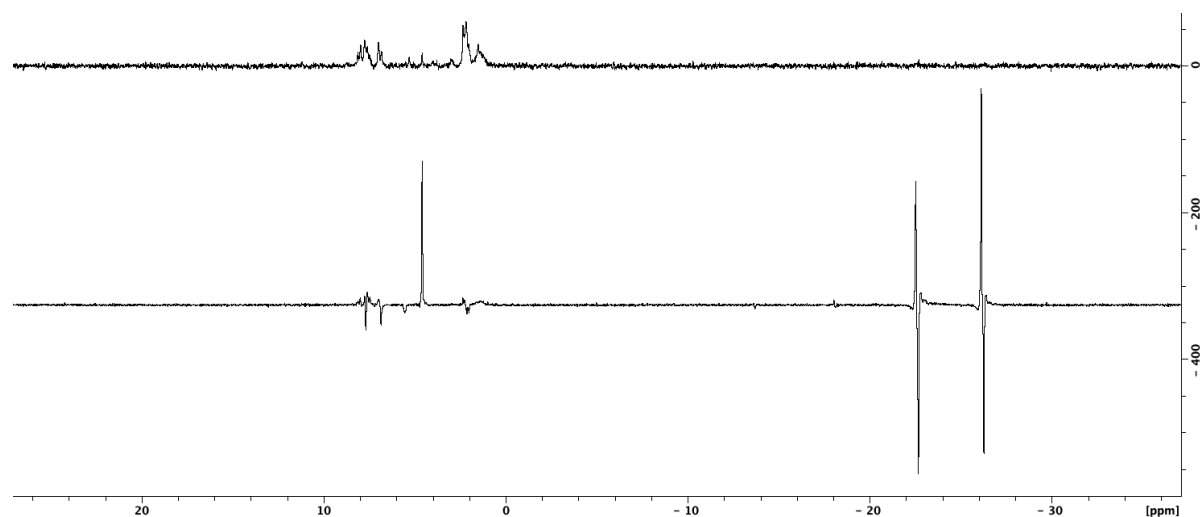

### 3.7 Compound (*E:Z*)-1 (14:1 mixture)

*Top*: thermal spectrum (vertically expanded x8). *Bottom*: hyperpolarised spectrum. 60 MHz

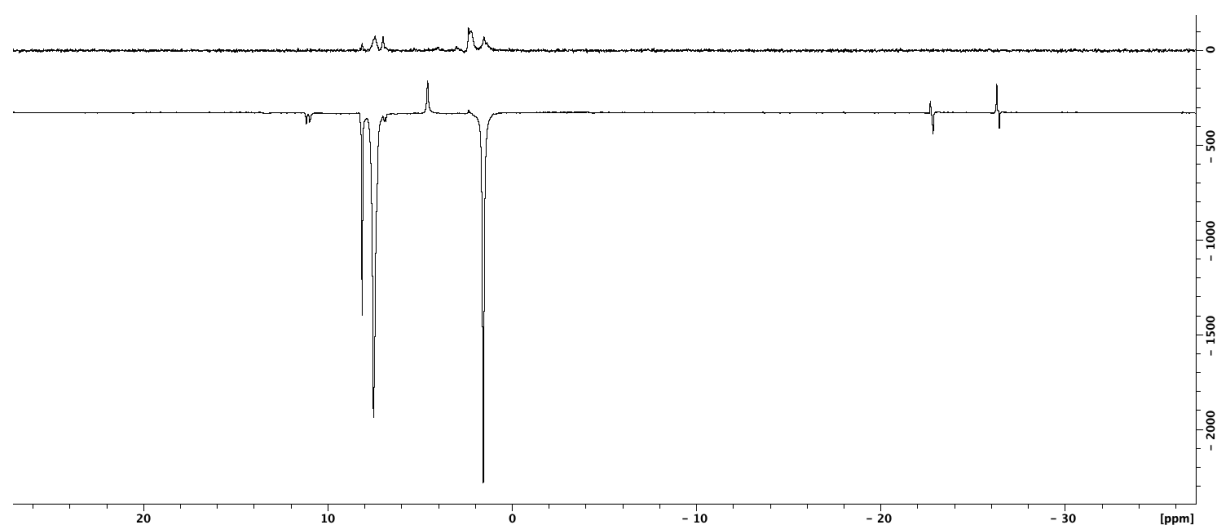

### 3.8 Summary of oxime enhancements

Enhancement factor =  $\frac{\text{Signal}(\text{hyperpolarised})}{\text{Signal}(\text{thermal})}$ , determined for the range corresponding to combined oxime CH resonances.

|                          | Range (ppm) | Enhancement factor |
|--------------------------|-------------|--------------------|
| <i>E</i> -1              | 8.3-7.1     | <b>-6.3</b>        |
| <i>Z</i> -1              | 8.7-6.7     | <b>-113.0</b>      |
| (14:1 mix) <i>E:Z</i> -1 | 8.5-6.7     | <b>-108.4</b>      |
| <i>E</i> -2              | 8.2-7.1     | -15.0              |
| <i>Z</i> -2              | 8.7-6.6     | -28.4              |
| <i>E</i> -3              | 8.3-7.4     | 0.1                |
| <i>Z</i> -3              | 8.3-6.7     | 0.3                |

### 3.9 SABRE-Relay: H<sub>2</sub>O hyperpolarisation after extended reaction times

In order to exclude the possibility of an overlapping PHIP response from production of cyclooctane (~1.5 ppm) from cyclooctadiene, a sample of **Z-1** and [IrCl(COD)(IMes)] in CD<sub>2</sub>Cl<sub>2</sub> prepared according to the procedure in Section 1.3 was left for 3 days under H<sub>2</sub> (2 bar) to consume any residual cyclooctadiene or cyclooctane, then refilled with fresh p-H<sub>2</sub> for analysis of SABRE as before.

**Z-1**: *Top*: thermal spectrum (vertically expanded x64). *Bottom*: hyperpolarised spectrum.  
60 MHz

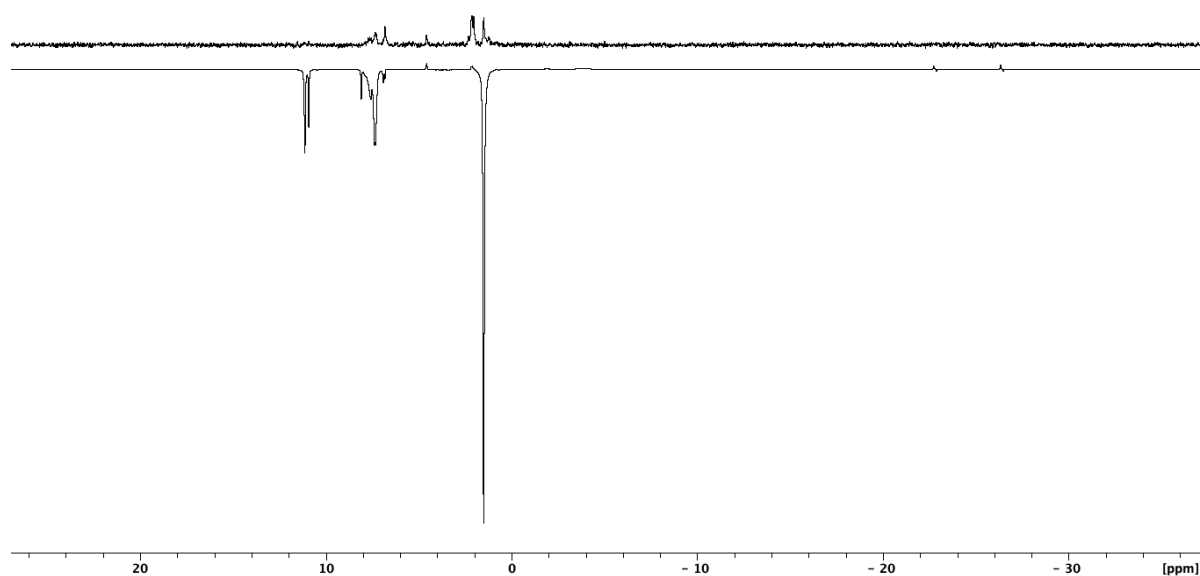

|                       | Range (ppm) | Enhancement factor |
|-----------------------|-------------|--------------------|
| <b>Oxime CH</b>       | 8.3-6.7     | <b>-272.0</b>      |
| <b>H<sub>2</sub>O</b> | 2.0-0.9     | <b>-660.6</b>      |



### 3.10 SABRE-Relay: MeOH hyperpolarisation in dried CD<sub>2</sub>Cl<sub>2</sub>

**Z-1** (30 mM), **MeOH** (20 mM), [IrCl(COD)(IMes)] (10 mM) in CD<sub>2</sub>Cl<sub>2</sub> (dried over CaH<sub>2</sub> and 4A MS), under H<sub>2</sub> (2 bar), hyperpolarised according to the procedure in Section 1.3.

*Top:* thermal spectrum (vertically expanded x8). *Bottom:* hyperpolarised spectrum. 60 MHz

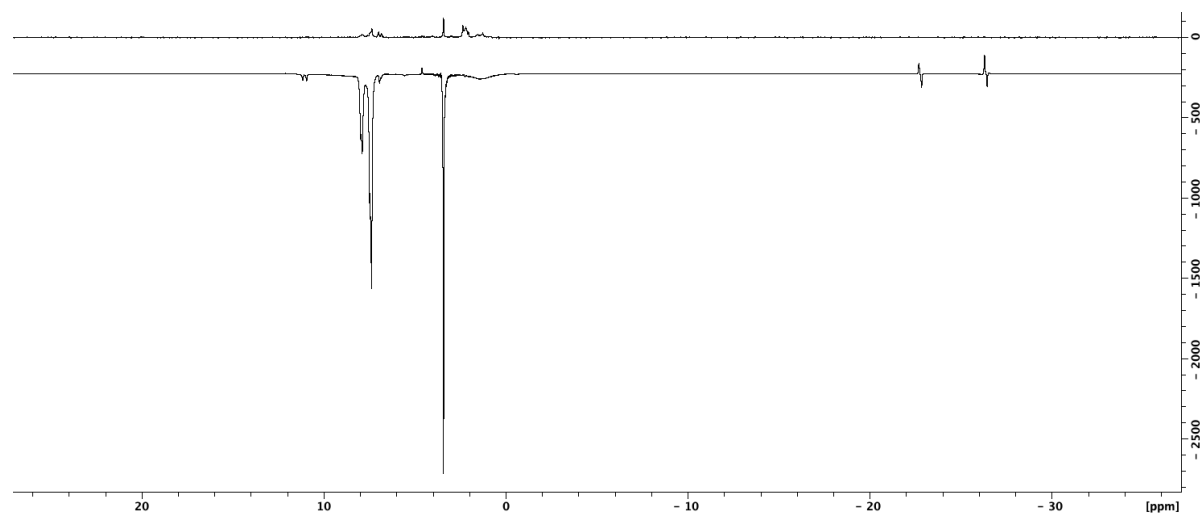

|                         | Range (ppm) | Enhancement factor |
|-------------------------|-------------|--------------------|
| <b>Oxime CH</b>         | 8.3-6.7     | <b>-132.1</b>      |
| <b>CH<sub>3</sub>OH</b> | 3.6-3.1     | <b>-173.1</b>      |

## Appendix S4. Computational details

### 4.1 General details and summary of energies

All calculations were performed using the Gaussian 16 program package.<sup>5</sup> Geometry optimisations were conducted at the SMD<sup>6</sup>-(DCM)- $\omega$ B97X-D<sup>7</sup>/def2-SVP<sup>8</sup> level of theory, with frequency calculations run at the same level of theory to confirm the resulting structures as energy minima with no imaginary frequencies and to obtain ZPVE and thermal corrections. No wavefunction instabilities were found. Subsequent single point calculations were performed at the SMD<sup>6</sup>-(DCM)- $\omega$ B97X-D<sup>7</sup>/def2-TZVPP<sup>8</sup> level of theory to obtain a refined electronic energy.

|                                                                               | SCF Energy (Ha) | Thermal correction to Gibbs Free Energy (Ha) |
|-------------------------------------------------------------------------------|-----------------|----------------------------------------------|
| [IrCl(H) <sub>2</sub> (IMes)(Z-1) <sub>2</sub> ]                              | -2292.080995    | 0.602034                                     |
| [Ir(H <sub>2</sub> O)(H) <sub>2</sub> (IMes)(Z-1) <sub>2</sub> ] <sup>+</sup> | -1908.131533    | 0.628443                                     |
| [IrCl(H) <sub>2</sub> (IMes)(E-1) <sub>2</sub> ]                              | -2292.077068    | 0.602454                                     |
| [IrCl(H) <sub>2</sub> (IMes)(Z-1 <sub>ax</sub> )(E-1 <sub>eq</sub> )]         | -2292.077379    | 0.601473                                     |
| Z-1                                                                           | -400.900292     | 0.096417                                     |
| E-1                                                                           | -400.903636     | 0.095408                                     |
| H <sub>2</sub> O                                                              | -76.448441      | 0.003801                                     |
| Cl <sup>-</sup>                                                               | -460.369284     | -0.015023                                    |

### 4.2 Cartesian coordinates for optimised geometries

#### [IrCl(H)<sub>2</sub>(IMes)(Z-1)<sub>2</sub>]

0 1

C -3.157704 -3.033399 0.618079  
C -1.962258 -3.659891 0.645711  
N -1.000084 -2.684573 0.438324  
C -1.558417 -1.450932 0.274034  
N -2.900093 -1.690628 0.393184  
C -3.962416 -0.728766 0.343349  
C -4.665258 -0.558973 -0.856722  
C -5.708812 0.370121 -0.873764  
C -6.059963 1.106915 0.261755  
C -5.351256 0.883087 1.446320  
C -4.300809 -0.035258 1.513340  
C -4.302891 -1.349264 -2.083043  
C -3.534374 -0.248811 2.788330  
C -7.160449 2.132662 0.202167  
C 0.396502 -2.996469 0.441330  
C 1.006046 -3.374407 -0.762072

|    |           |           |           |
|----|-----------|-----------|-----------|
| C  | 2.362338  | -3.699125 | -0.729044 |
| C  | 3.099560  | -3.662281 | 0.459596  |
| C  | 2.448357  | -3.290390 | 1.638516  |
| C  | 1.092504  | -2.950792 | 1.653795  |
| C  | 0.411917  | -2.508377 | 2.919294  |
| C  | 0.221283  | -3.394424 | -2.043350 |
| C  | 4.570397  | -3.976557 | 0.449503  |
| Ir | -0.665091 | 0.315741  | -0.049547 |
| H  | -2.064519 | 0.933413  | 0.297305  |
| H  | -0.354837 | 0.395426  | 1.487936  |
| Cl | -1.078273 | 0.293026  | -2.644612 |
| N  | 1.460896  | -0.301166 | -0.623935 |
| N  | 0.166871  | 2.287887  | -0.338912 |
| O  | 1.746049  | -0.453509 | -1.937264 |
| C  | 2.458026  | -0.291297 | 0.182730  |
| C  | 3.900447  | -0.415829 | -0.060246 |
| O  | -0.031939 | 2.889748  | -1.533577 |
| C  | 0.843833  | 2.948375  | 0.531808  |
| C  | 1.475991  | 4.269724  | 0.456730  |
| C  | 4.506498  | -0.601793 | -1.315472 |
| C  | 5.892807  | -0.713408 | -1.413212 |
| C  | 6.694954  | -0.646425 | -0.274290 |
| C  | 6.103638  | -0.466944 | 0.977356  |
| C  | 4.721534  | -0.353074 | 1.080511  |
| C  | 1.419178  | 5.150080  | -0.639899 |
| C  | 2.075015  | 6.378277  | -0.584470 |
| C  | 2.793478  | 6.751637  | 0.551142  |
| C  | 2.855339  | 5.888081  | 1.645876  |
| C  | 2.202100  | 4.661661  | 1.597681  |
| H  | -4.169860 | -3.408941 | 0.738500  |
| H  | -1.696825 | -4.702659 | 0.794804  |
| H  | -6.263401 | 0.521503  | -1.804415 |
| H  | -5.623280 | 1.439286  | 2.348100  |
| H  | -3.261610 | -1.149145 | -2.378279 |
| H  | -4.956118 | -1.083989 | -2.925487 |
| H  | -4.396417 | -2.432491 | -1.906734 |
| H  | -4.045450 | 0.223356  | 3.638202  |
| H  | -2.526791 | 0.189395  | 2.706067  |
| H  | -3.404043 | -1.318786 | 3.011706  |
| H  | -7.949691 | 1.836321  | -0.504185 |
| H  | -6.764940 | 3.104194  | -0.137526 |
| H  | -7.618731 | 2.290800  | 1.189101  |
| H  | 2.862323  | -3.977802 | -1.661149 |
| H  | 3.013614  | -3.251954 | 2.574190  |
| H  | 1.077877  | -2.623052 | 3.785161  |
| H  | -0.506488 | -3.084238 | 3.111967  |
| H  | 0.116677  | -1.449132 | 2.849454  |
| H  | -0.595360 | -4.132924 | -2.001937 |
| H  | 0.867108  | -3.646647 | -2.895037 |
| H  | -0.241306 | -2.415248 | -2.239841 |

|   |           |           |           |
|---|-----------|-----------|-----------|
| H | 4.771713  | -4.931100 | -0.060639 |
| H | 4.979519  | -4.035938 | 1.467839  |
| H | 5.125504  | -3.194373 | -0.093386 |
| H | 0.881206  | -0.314450 | -2.386659 |
| H | 2.155723  | -0.166893 | 1.225027  |
| H | -0.459993 | 2.196775  | -2.086184 |
| H | 0.961394  | 2.410813  | 1.475003  |
| H | 3.891513  | -0.660741 | -2.209585 |
| H | 6.350090  | -0.856443 | -2.395005 |
| H | 7.780239  | -0.737019 | -0.360933 |
| H | 6.722271  | -0.417183 | 1.876217  |
| H | 4.260679  | -0.216589 | 2.062450  |
| H | 0.862029  | 4.872350  | -1.530686 |
| H | 2.022429  | 7.051886  | -1.442861 |
| H | 3.304935  | 7.716483  | 0.584032  |
| H | 3.414432  | 6.171731  | 2.540284  |
| H | 2.252180  | 3.987593  | 2.456646  |

**[Ir(H<sub>2</sub>O)(H)<sub>2</sub>(IMes)(Z-1)<sub>2</sub>]<sup>+</sup>**

1 1

|    |           |           |           |
|----|-----------|-----------|-----------|
| C  | 1.449243  | -1.511838 | -0.369793 |
| N  | 2.730036  | -1.807748 | -0.015836 |
| C  | 2.971966  | -3.170815 | -0.069053 |
| C  | 1.815908  | -3.749351 | -0.461755 |
| N  | 0.895986  | -2.727087 | -0.636064 |
| C  | 3.681830  | -0.857912 | 0.468144  |
| C  | -0.479125 | -2.978659 | -0.950631 |
| C  | -1.350226 | -3.282954 | 0.102336  |
| C  | -2.690338 | -3.527621 | -0.210486 |
| C  | -3.161069 | -3.465381 | -1.523846 |
| C  | -2.250070 | -3.178377 | -2.548188 |
| C  | -0.897744 | -2.946987 | -2.288311 |
| C  | 4.566185  | -0.246755 | -0.427452 |
| C  | 5.453814  | 0.704626  | 0.085771  |
| C  | 5.481289  | 1.034081  | 1.443488  |
| C  | 4.596963  | 0.376816  | 2.310299  |
| C  | 3.694229  | -0.584061 | 1.845401  |
| Ir | 0.628025  | 0.315541  | -0.584373 |
| H  | 1.805949  | 0.603399  | -1.627149 |
| H  | -0.161726 | -0.310623 | -1.755599 |
| N  | -0.177356 | 2.259109  | -1.007043 |
| N  | -0.994930 | 0.007196  | 0.860921  |
| O  | 1.565702  | 1.455034  | 1.328914  |
| C  | 2.745036  | -1.286995 | 2.778637  |
| C  | 4.560297  | -0.610095 | -1.885253 |
| C  | 6.462851  | 2.042075  | 1.975965  |
| C  | 0.081615  | -2.681683 | -3.398110 |
| C  | -4.612368 | -3.709492 | -1.839818 |
| C  | -0.863385 | -3.322831 | 1.524636  |

|   |           |           |           |
|---|-----------|-----------|-----------|
| H | 1.547998  | 2.416499  | 1.201057  |
| H | 2.489662  | 1.230431  | 1.537415  |
| O | 0.254726  | 2.822106  | -2.167504 |
| O | -0.705404 | 0.216935  | 2.176604  |
| C | -1.013974 | 2.948096  | -0.314473 |
| C | -1.601905 | 4.269333  | -0.544677 |
| C | -2.201518 | -0.327461 | 0.579447  |
| C | -3.365866 | -0.547571 | 1.439923  |
| C | -3.349683 | -0.582426 | 2.846048  |
| C | -4.524462 | -0.841803 | 3.549137  |
| C | -5.723333 | -1.064996 | 2.872063  |
| C | -5.750344 | -1.032140 | 1.476645  |
| C | -4.580873 | -0.780259 | 0.768935  |
| C | -2.502675 | 4.710777  | 0.443761  |
| C | -1.340338 | 5.107030  | -1.645307 |
| C | -1.965774 | 6.347876  | -1.739561 |
| C | -2.854690 | 6.773526  | -0.752309 |
| C | -3.123530 | 5.950374  | 0.342105  |
| H | 3.941658  | -3.591932 | 0.180826  |
| H | 1.552967  | -4.789529 | -0.632061 |
| H | -3.387936 | -3.751119 | 0.601119  |
| H | -2.601976 | -3.141782 | -3.583277 |
| H | 6.145205  | 1.201771  | -0.600105 |
| H | 4.614436  | 0.613064  | 3.377975  |
| H | 2.848544  | -0.905632 | 3.802880  |
| H | 2.937211  | -2.371175 | 2.794771  |
| H | 1.697369  | -1.156415 | 2.466587  |
| H | 3.567327  | -0.445281 | -2.329681 |
| H | 4.806196  | -1.674415 | -2.025868 |
| H | 5.294417  | -0.012472 | -2.441635 |
| H | 6.816747  | 2.717144  | 1.184211  |
| H | 7.344877  | 1.533648  | 2.398617  |
| H | 6.019644  | 2.647444  | 2.780062  |
| H | -0.415426 | -2.718816 | -4.376619 |
| H | 0.891715  | -3.427938 | -3.396245 |
| H | 0.553671  | -1.693402 | -3.288023 |
| H | -5.221378 | -3.754992 | -0.926103 |
| H | -4.741868 | -4.661770 | -2.378986 |
| H | -5.016677 | -2.915541 | -2.486250 |
| H | -0.342171 | -2.392114 | 1.796024  |
| H | -0.150952 | -4.148569 | 1.680896  |
| H | -1.701197 | -3.462067 | 2.220926  |
| H | 0.901518  | 2.179961  | -2.502964 |
| H | 0.173782  | 0.645137  | 2.158610  |
| H | -1.328167 | 2.443801  | 0.602172  |
| H | -2.357407 | -0.470156 | -0.492902 |
| H | -2.420933 | -0.415386 | 3.385945  |
| H | -4.500747 | -0.870763 | 4.640786  |
| H | -6.638807 | -1.267917 | 3.432610  |
| H | -6.684613 | -1.208925 | 0.939461  |

|   |           |           |           |
|---|-----------|-----------|-----------|
| H | -4.598054 | -0.768978 | -0.323812 |
| H | -2.716684 | 4.066488  | 1.300518  |
| H | -0.651878 | 4.788612  | -2.423613 |
| H | -1.754692 | 6.989662  | -2.597732 |
| H | -3.340168 | 7.748490  | -0.836705 |
| H | -3.819340 | 6.275730  | 1.118283  |

**[IrCl(H)<sub>2</sub>(IMes)(E-1)<sub>2</sub>]**

0 1

|    |           |           |           |
|----|-----------|-----------|-----------|
| N  | -0.372789 | -2.020267 | 1.308628  |
| C  | -1.153788 | -1.077089 | 0.699467  |
| N  | -2.416943 | -1.398257 | 1.106105  |
| C  | -2.420039 | -2.512239 | 1.930178  |
| C  | -1.134842 | -2.903604 | 2.057560  |
| C  | -3.627967 | -0.702037 | 0.788747  |
| C  | 1.057485  | -2.121168 | 1.289963  |
| C  | 1.657373  | -3.036803 | 0.415103  |
| C  | 3.047609  | -3.168828 | 0.459381  |
| C  | 3.830028  | -2.434903 | 1.354775  |
| C  | 3.188642  | -1.554658 | 2.230856  |
| C  | 1.801763  | -1.386249 | 2.225154  |
| C  | -4.411115 | -1.171939 | -0.271572 |
| C  | -5.604176 | -0.501766 | -0.548476 |
| C  | -6.017498 | 0.603321  | 0.200971  |
| C  | -5.218982 | 1.020853  | 1.271001  |
| C  | -4.022454 | 0.375343  | 1.593085  |
| C  | 1.133705  | -0.449462 | 3.193379  |
| C  | 0.828439  | -3.874064 | -0.519736 |
| C  | 5.324854  | -2.609144 | 1.388287  |
| C  | -3.973198 | -2.361390 | -1.079381 |
| C  | -7.279920 | 1.344368  | -0.151197 |
| C  | -3.197646 | 0.807972  | 2.774238  |
| Ir | -0.546467 | 0.469414  | -0.417831 |
| N  | 0.557427  | -0.849935 | -1.972043 |
| H  | -1.396162 | 1.379964  | 0.536980  |
| Cl | -2.442474 | 0.487648  | -2.297638 |
| N  | 0.209860  | 2.212629  | -1.519489 |
| H  | -3.340239 | -2.912553 | 2.346071  |
| H  | -0.681975 | -3.720665 | 2.611825  |
| H  | 3.532514  | -3.865862 | -0.230254 |
| H  | 3.785082  | -0.977086 | 2.942928  |
| H  | -6.222441 | -0.847039 | -1.382079 |
| H  | -5.539997 | 1.870118  | 1.881178  |
| H  | 1.839804  | -0.115723 | 3.965595  |
| H  | 0.275095  | -0.926398 | 3.690688  |
| H  | 0.750102  | 0.441727  | 2.673245  |
| H  | 0.083453  | -3.272957 | -1.059016 |
| H  | 0.280627  | -4.653698 | 0.034664  |
| H  | 1.465179  | -4.377563 | -1.260435 |

|   |           |           |           |
|---|-----------|-----------|-----------|
| H | 5.728633  | -2.784946 | 0.380715  |
| H | 5.602710  | -3.476728 | 2.009894  |
| H | 5.823742  | -1.725708 | 1.811583  |
| H | -2.930009 | -2.250134 | -1.406625 |
| H | -4.601638 | -2.482405 | -1.971988 |
| H | -4.037268 | -3.290058 | -0.489189 |
| H | -8.023174 | 0.678674  | -0.613617 |
| H | -7.065283 | 2.149330  | -0.873555 |
| H | -7.734778 | 1.811414  | 0.734506  |
| H | -3.716461 | 1.586127  | 3.350162  |
| H | -2.225539 | 1.210274  | 2.450892  |
| H | -2.988998 | -0.037637 | 3.448351  |
| H | 0.591620  | 0.592906  | 0.625679  |
| C | 1.042172  | 3.142266  | -1.220106 |
| C | 1.631144  | 3.409800  | 0.099724  |
| O | -0.122910 | 2.243738  | -2.841632 |
| C | 0.941201  | 3.249097  | 1.309803  |
| C | 1.574607  | 3.521664  | 2.519645  |
| C | 2.898038  | 3.965199  | 2.539098  |
| C | 3.581192  | 4.160274  | 1.338321  |
| C | 2.947918  | 3.894667  | 0.126550  |
| O | -0.349793 | -1.590287 | -2.686646 |
| C | 1.754006  | -1.115347 | -2.346971 |
| C | 3.013704  | -0.586484 | -1.817023 |
| C | 3.123347  | 0.300419  | -0.738649 |
| C | 4.375006  | 0.715434  | -0.294433 |
| C | 5.535629  | 0.258593  | -0.919277 |
| C | 5.439403  | -0.622081 | -1.997493 |
| C | 4.188564  | -1.042194 | -2.440166 |
| H | 1.368420  | 3.782186  | -2.049517 |
| H | -0.926222 | 1.672688  | -2.898687 |
| H | -0.095799 | 2.916565  | 1.297916  |
| H | 1.026555  | 3.391337  | 3.455585  |
| H | 3.392219  | 4.173863  | 3.490935  |
| H | 4.611990  | 4.521588  | 1.344286  |
| H | 3.484592  | 4.047079  | -0.813316 |
| H | -1.187734 | -1.074946 | -2.618294 |
| H | 1.849017  | -1.837667 | -3.168162 |
| H | 2.222256  | 0.645279  | -0.234514 |
| H | 4.439755  | 1.397938  | 0.555443  |
| H | 6.515649  | 0.585387  | -0.563672 |
| H | 6.342004  | -0.986467 | -2.493135 |
| H | 4.116229  | -1.736815 | -3.281219 |

**[IrCl(H)<sub>2</sub>(IMes)(Z-1<sub>ax</sub>)(E-1<sub>eq</sub>)]**

0 1

|   |          |          |          |
|---|----------|----------|----------|
| N | 1.762406 | 2.357750 | 0.336667 |
| C | 1.873719 | 1.000888 | 0.234235 |
| N | 3.182711 | 0.765942 | 0.553890 |

|    |           |           |           |
|----|-----------|-----------|-----------|
| C  | 3.855869  | 1.943505  | 0.838579  |
| C  | 2.961734  | 2.946045  | 0.701656  |
| C  | 3.830442  | -0.508428 | 0.662086  |
| C  | 0.562849  | 3.114779  | 0.153839  |
| C  | 0.291609  | 3.660738  | -1.103242 |
| C  | -0.901378 | 4.373024  | -1.257182 |
| C  | -1.795418 | 4.546595  | -0.198520 |
| C  | -1.458645 | 4.024139  | 1.057004  |
| C  | -0.278378 | 3.310725  | 1.259143  |
| C  | 4.599905  | -0.972611 | -0.412857 |
| C  | 5.232509  | -2.210681 | -0.273344 |
| C  | 5.119739  | -2.969968 | 0.895511  |
| C  | 4.365129  | -2.455063 | 1.954205  |
| C  | 3.715172  | -1.221829 | 1.863144  |
| C  | 0.096583  | 2.774640  | 2.613912  |
| C  | 1.249751  | 3.472319  | -2.245720 |
| C  | -3.106856 | 5.260263  | -0.391778 |
| C  | 4.734420  | -0.163231 | -1.672416 |
| C  | 5.777274  | -4.320264 | 1.001053  |
| C  | 2.891134  | -0.691169 | 3.002675  |
| Ir | 0.468312  | -0.354057 | -0.233648 |
| N  | -1.293058 | 0.950814  | -1.213542 |
| H  | 1.513885  | -1.401885 | 0.246023  |
| Cl | 1.262443  | -0.591623 | -2.731921 |
| N  | -0.993789 | -1.877635 | -0.677173 |
| H  | 4.906579  | 1.949071  | 1.114042  |
| H  | 3.057235  | 4.020512  | 0.830131  |
| H  | -1.145732 | 4.784564  | -2.240280 |
| H  | -2.142379 | 4.166942  | 1.898805  |
| H  | 5.831845  | -2.591999 | -1.105144 |
| H  | 4.279804  | -3.028682 | 2.881718  |
| H  | -0.723515 | 2.910849  | 3.331671  |
| H  | 0.984555  | 3.293947  | 3.009472  |
| H  | 0.347366  | 1.703735  | 2.570161  |
| H  | 1.543176  | 2.418158  | -2.355326 |
| H  | 2.174515  | 4.050245  | -2.084963 |
| H  | 0.801886  | 3.804871  | -3.191514 |
| H  | -3.169332 | 5.732774  | -1.382153 |
| H  | -3.255012 | 6.038815  | 0.372252  |
| H  | -3.948044 | 4.553850  | -0.300337 |
| H  | 3.747544  | 0.007380  | -2.128839 |
| H  | 5.366832  | -0.683123 | -2.404946 |
| H  | 5.184078  | 0.822147  | -1.472279 |
| H  | 6.712835  | -4.358742 | 0.424165  |
| H  | 5.113642  | -5.105121 | 0.601943  |
| H  | 6.001869  | -4.579301 | 2.045825  |
| H  | 3.073786  | -1.265391 | 3.921008  |
| H  | 1.817819  | -0.759286 | 2.762972  |
| H  | 3.111071  | 0.367988  | 3.206178  |
| H  | -0.007465 | -0.293955 | 1.255819  |



|   |           |           |           |
|---|-----------|-----------|-----------|
| C | -1.923668 | -2.266228 | 0.120123  |
| C | -3.076404 | -3.143096 | -0.107365 |
| O | -1.022388 | -2.386762 | -1.930728 |
| C | -4.032911 | -3.161401 | 0.925323  |
| C | -5.186703 | -3.929939 | 0.818689  |
| C | -5.401174 | -4.706148 | -0.321336 |
| C | -4.456493 | -4.705050 | -1.347710 |
| C | -3.302134 | -3.930374 | -1.251190 |
| O | -1.007887 | 1.338166  | -2.490042 |
| C | -2.520125 | 1.190950  | -0.932496 |
| C | -3.224487 | 0.899299  | 0.322908  |
| C | -2.604825 | 0.787512  | 1.574013  |
| C | -3.353352 | 0.494707  | 2.710163  |
| C | -4.734641 | 0.311720  | 2.616691  |
| C | -5.365029 | 0.433788  | 1.378382  |
| C | -4.616731 | 0.735277  | 0.242587  |
| H | -1.847133 | -1.821194 | 1.113357  |
| H | -0.275277 | -1.940899 | -2.391898 |
| H | -3.866527 | -2.550414 | 1.816530  |
| H | -5.920349 | -3.924418 | 1.627892  |
| H | -6.304870 | -5.313901 | -0.408929 |
| H | -4.619174 | -5.314496 | -2.239652 |
| H | -2.573927 | -3.936858 | -2.058430 |
| H | -0.178202 | 0.862310  | -2.715055 |
| H | -3.130150 | 1.615222  | -1.741075 |
| H | -1.529423 | 0.923400  | 1.649952  |
| H | -2.852569 | 0.411087  | 3.677544  |
| H | -5.319441 | 0.079428  | 3.509826  |
| H | -6.445328 | 0.295868  | 1.295181  |
| H | -5.114649 | 0.834513  | -0.725432 |

## Z-1

0 1

|   |           |           |           |
|---|-----------|-----------|-----------|
| C | -1.507616 | 1.423802  | -0.000021 |
| C | -0.186926 | 0.977526  | -0.000074 |
| C | 0.095260  | -0.401282 | -0.000037 |
| C | -0.983394 | -1.305359 | 0.000101  |
| C | -2.299478 | -0.854634 | 0.000164  |
| C | -2.565779 | 0.515422  | 0.000100  |
| C | 1.444478  | -0.995856 | -0.000074 |
| N | 2.615190  | -0.478852 | -0.000096 |
| O | 2.652760  | 0.885155  | -0.000051 |
| H | 1.474920  | -2.091325 | -0.000124 |
| H | 0.628843  | 1.696220  | -0.000161 |
| H | -1.710001 | 2.497463  | -0.000069 |
| H | -3.597714 | 0.874254  | 0.000152  |
| H | -3.120992 | -1.574724 | 0.000260  |
| H | -0.779475 | -2.379550 | 0.000146  |
| H | 3.596741  | 1.090673  | -0.000071 |

**E-1**

0 1

|   |           |           |           |
|---|-----------|-----------|-----------|
| C | -2.765655 | 0.266923  | -0.000000 |
| C | -1.863564 | 1.334894  | 0.000000  |
| C | -0.493325 | 1.096181  | 0.000000  |
| C | -0.003704 | -0.220411 | 0.000000  |
| C | -0.914706 | -1.285159 | 0.000000  |
| C | -2.288146 | -1.042820 | -0.000000 |
| C | 1.437976  | -0.515829 | 0.000000  |
| N | 2.306941  | 0.417483  | -0.000000 |
| O | 3.587752  | -0.056518 | -0.000000 |
| H | -3.841229 | 0.458843  | -0.000000 |
| H | -2.234104 | 2.362716  | 0.000000  |
| H | 0.213161  | 1.928835  | 0.000000  |
| H | -0.541797 | -2.312897 | 0.000000  |
| H | -2.987454 | -1.882151 | -0.000000 |
| H | 1.754443  | -1.569432 | 0.000001  |
| H | 4.133122  | 0.741174  | -0.000001 |

**H<sub>2</sub>O**

0 1

|   |           |           |           |
|---|-----------|-----------|-----------|
| O | 0.000000  | 0.000000  | 0.120145  |
| H | -0.000000 | -0.754362 | -0.480579 |
| H | -0.000000 | 0.754362  | -0.480579 |

**Cl<sup>-</sup>**

-1 1

|    |          |          |          |
|----|----------|----------|----------|
| Cl | 0.000000 | 0.000000 | 0.000000 |
|----|----------|----------|----------|

## References

1. G. R. Fulmer, A. J. M. Miller, N. H. Sherden, H. E. Gottlieb, A. Nudelman, B. M. Stoltz, J. E. Bercaw and K. I. Goldberg, *Organometallics*, 2010, **29**, 2176-2179.
2. A. Dolšak, T. Bratkovič, L. Mlinarič, E. Ogorevc, U. Švajger, S. Gobec and M. Sova, *Pharmaceuticals*, 2021, **14**, 265.
3. P. J. Rayner, M. J. Burns, A. M. Olaru, P. Norcott, M. Fekete, G. G. R. Green, L. A. R. Highton, R. E. Mewis and S. B. Duckett, *Proc. Natl. Acad. Sci. U. S. A.*, 2017, **114**, E3188-E3194.
4. P. L. Norcott, *Phys. Chem. Chem. Phys.*, 2022, **24**, 13527-13533.
5. M. J. Frisch, G. W. Trucks, H. B. Schlegel, G. E. Scuseria, M. A. Robb, J. R. Cheeseman, G. Scalmani, V. Barone, G. A. Petersson, H. Nakatsuji, X. Li, M. Caricato, A. V. Marenich, J. Bloino, B. G. Janesko, R. Gomperts, B. Mennucci, H. P. Hratchian, J. V. Ortiz, A. F. Izmaylov, J. L. Sonnenberg, Williams, F. Ding, F. Lipparini, F. Egidi, J. Goings, B. Peng, A. Petrone, T. Henderson, D. Ranasinghe, V. G. Zakrzewski, J. Gao, N. Rega, G. Zheng, W. Liang, M. Hada, M. Ehara, K. Toyota, R. Fukuda, J. Hasegawa, M. Ishida, T. Nakajima, Y. Honda, O. Kitao, H. Nakai, T. Vreven, K. Throssell, J. A. Montgomery Jr., J. E. Peralta, F. Ogliaro, M. J. Bearpark, J. J. Heyd, E. N. Brothers, K. N. Kudin, V. N. Staroverov, T. A. Keith, R. Kobayashi, J. Normand, K. Raghavachari, A. P. Rendell, J. C. Burant, S. S. Iyengar, J. Tomasi, M. Cossi, J. M. Millam, M. Klene, C. Adamo, R. Cammi, J. W. Ochterski, R. L. Martin, K. Morokuma, O. Farkas, J. B. Foresman and D. J. Fox, Gaussian 16 Rev. C.01, 2016.
6. A. V. Marenich, C. J. Cramer and D. G. Truhlar, *J. Phys. Chem. B*, 2009, **113**, 6378-6396.
7. J.-D. Chai and M. Head-Gordon, *Phys. Chem. Chem. Phys.*, 2008, **10**, 6615-6620.
8. F. Weigend and R. Ahlrichs, *Phys. Chem. Chem. Phys.*, 2005, **7**, 3297-3305.
